# Supplementary material for: Reference genome and transcriptome informed by the sex chromosome complement of the sample increase ability to detect sex differences in gene expression from RNA-Seq data
Source: PubMed Central journal article supplement (PMC7374973; doi:10.1186/s13293-020-00312-9), 2020-07-21

**A** BLOOD aligned to HISAT and default reference genome

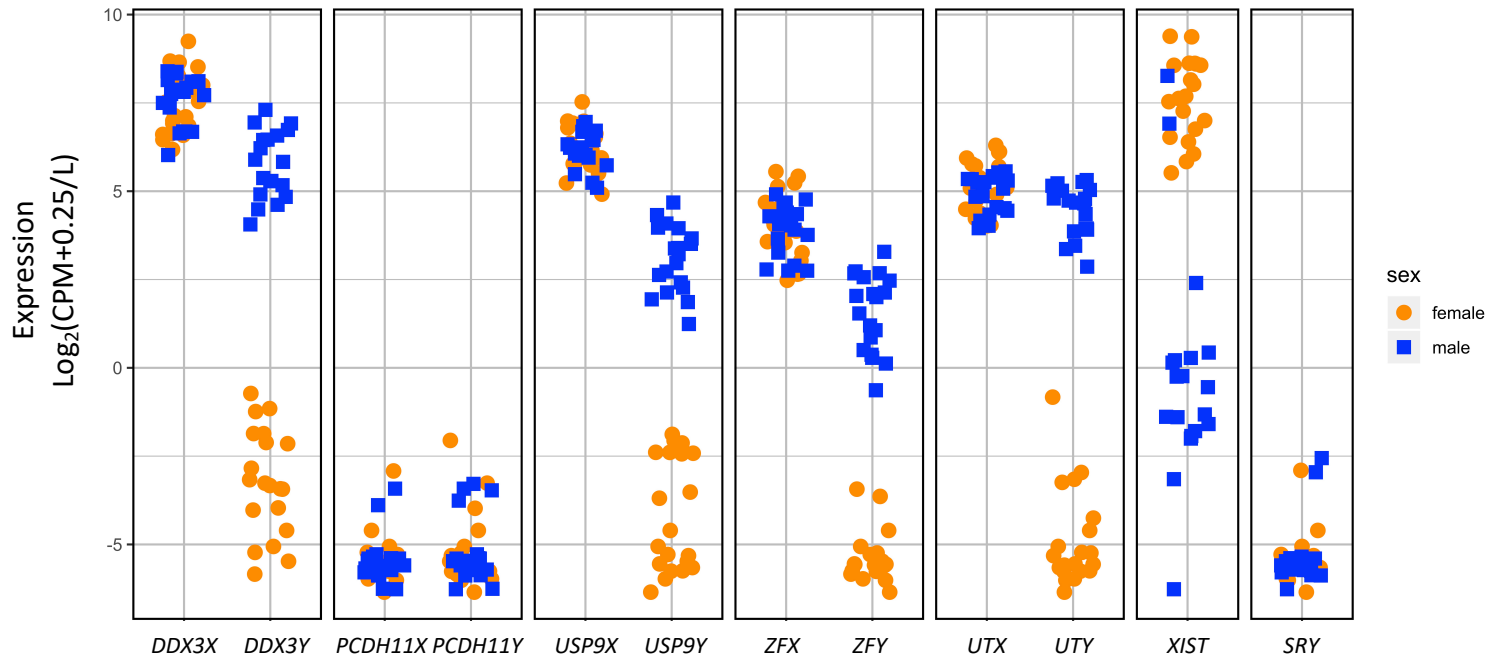

**B** BLOOD aligned to HISAT and sex chromosome complement reference genome

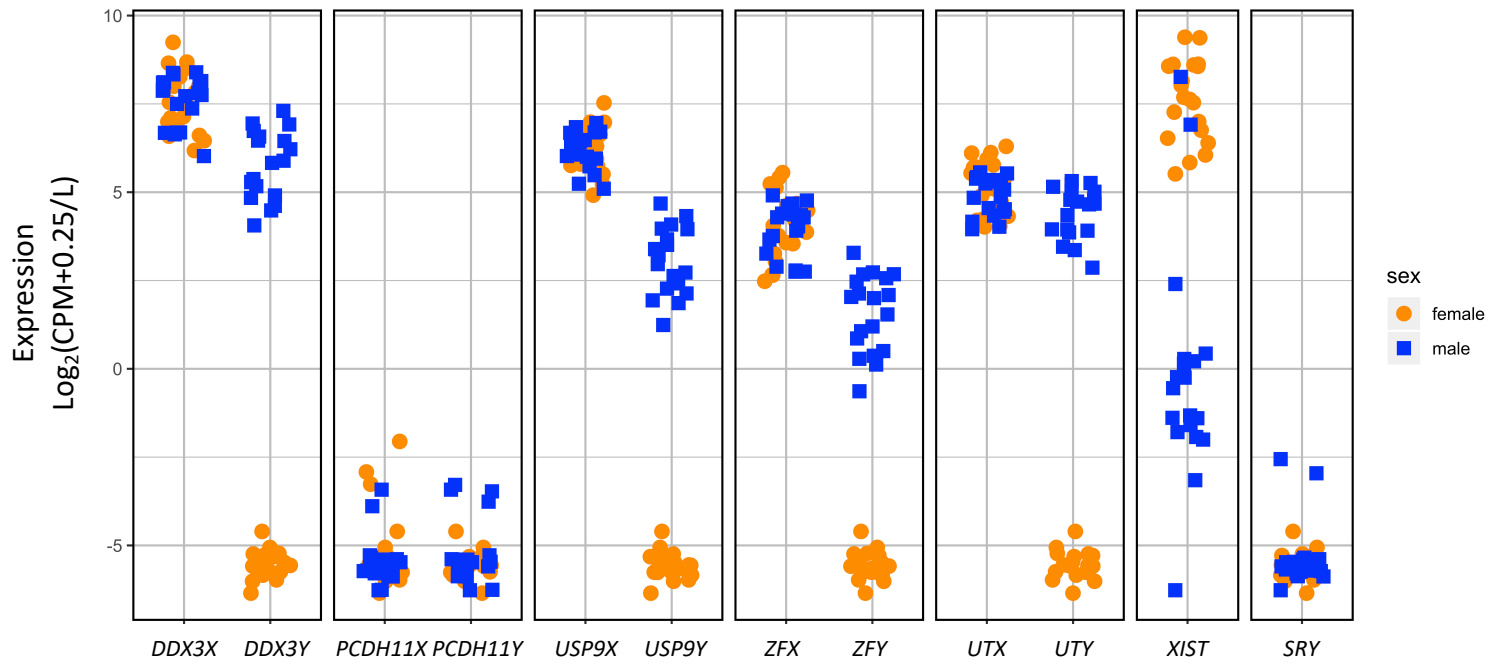

**C** BLOOD aligned to STAR and default reference genome

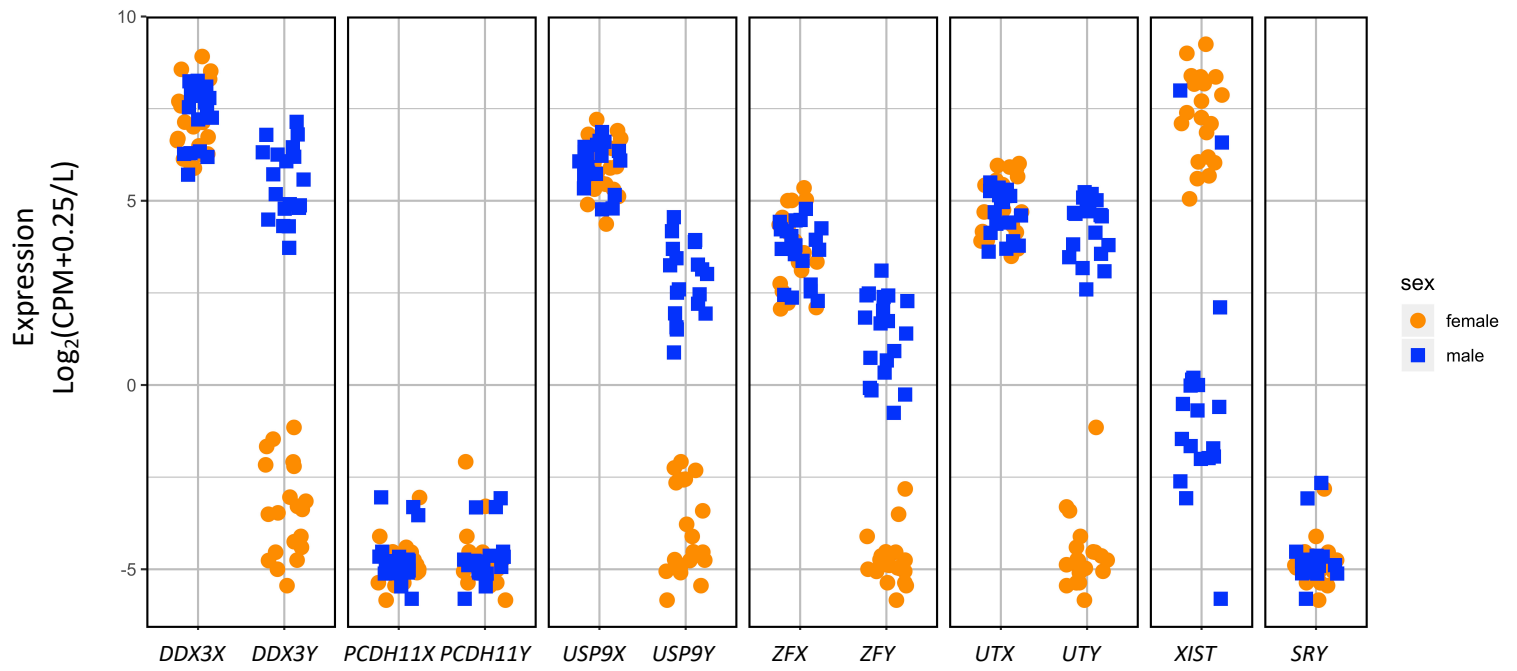

**D** BLOOD aligned to STAR and sex chromosome complement reference genome

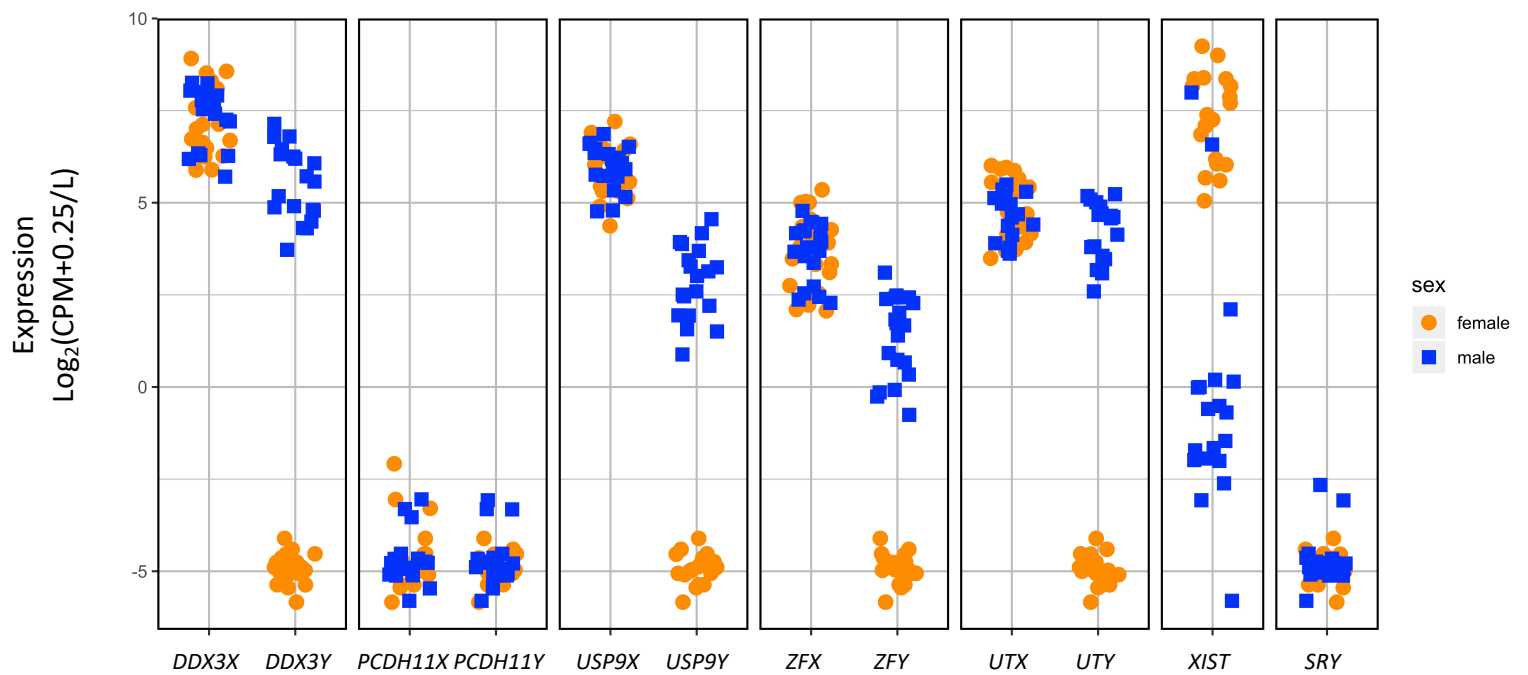

**E** BRAIN CORTEX aligned to HISAT and default reference genome

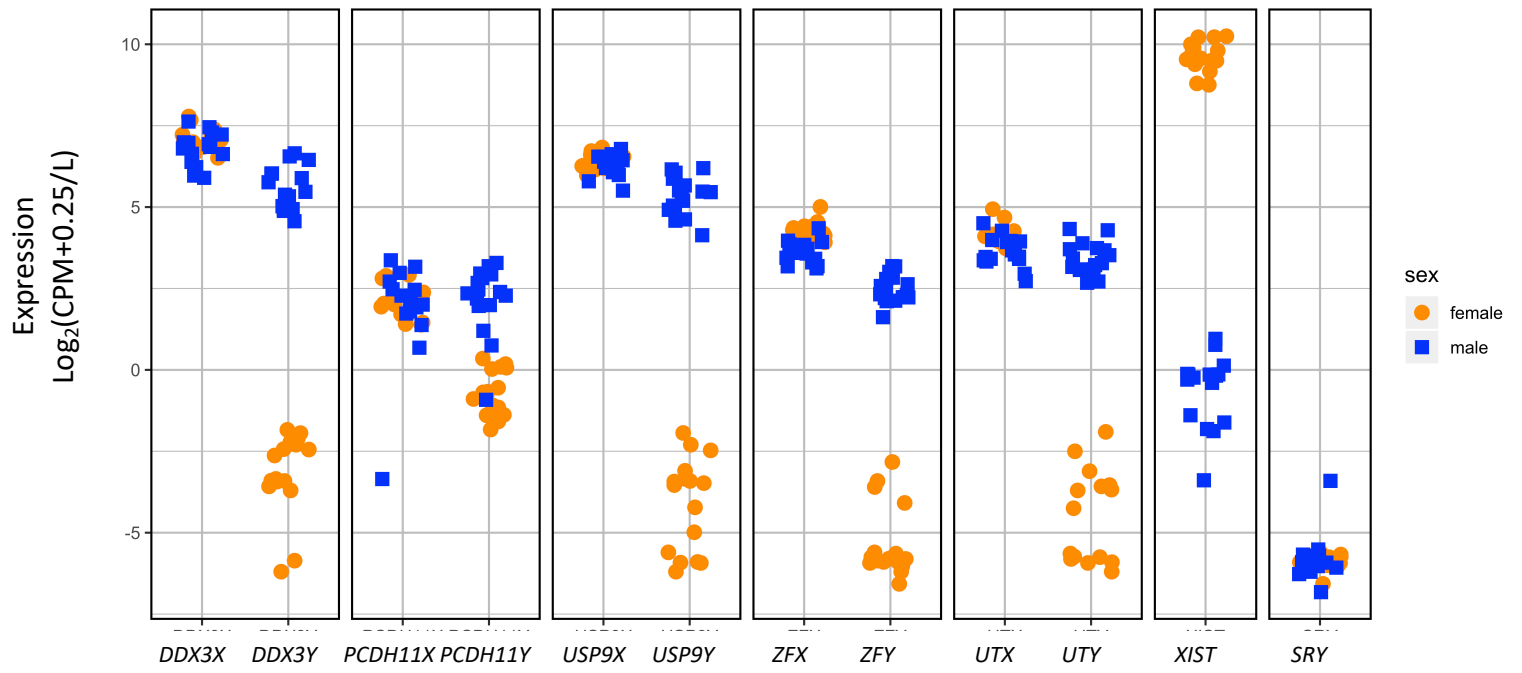

**F** BRAIN CORTEX aligned to HISAT and sex chromosome complement reference genome

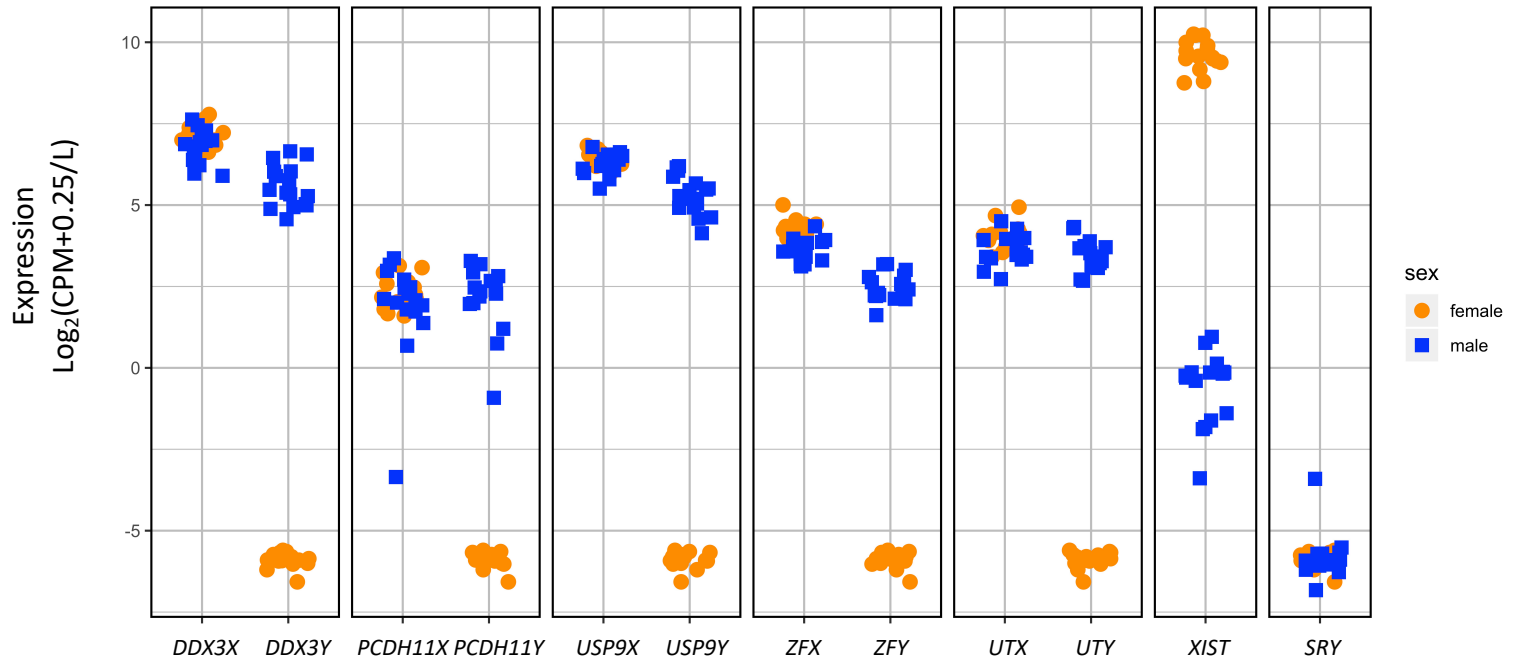

### G BRAIN CORTEX aligned to STAR and default reference genome

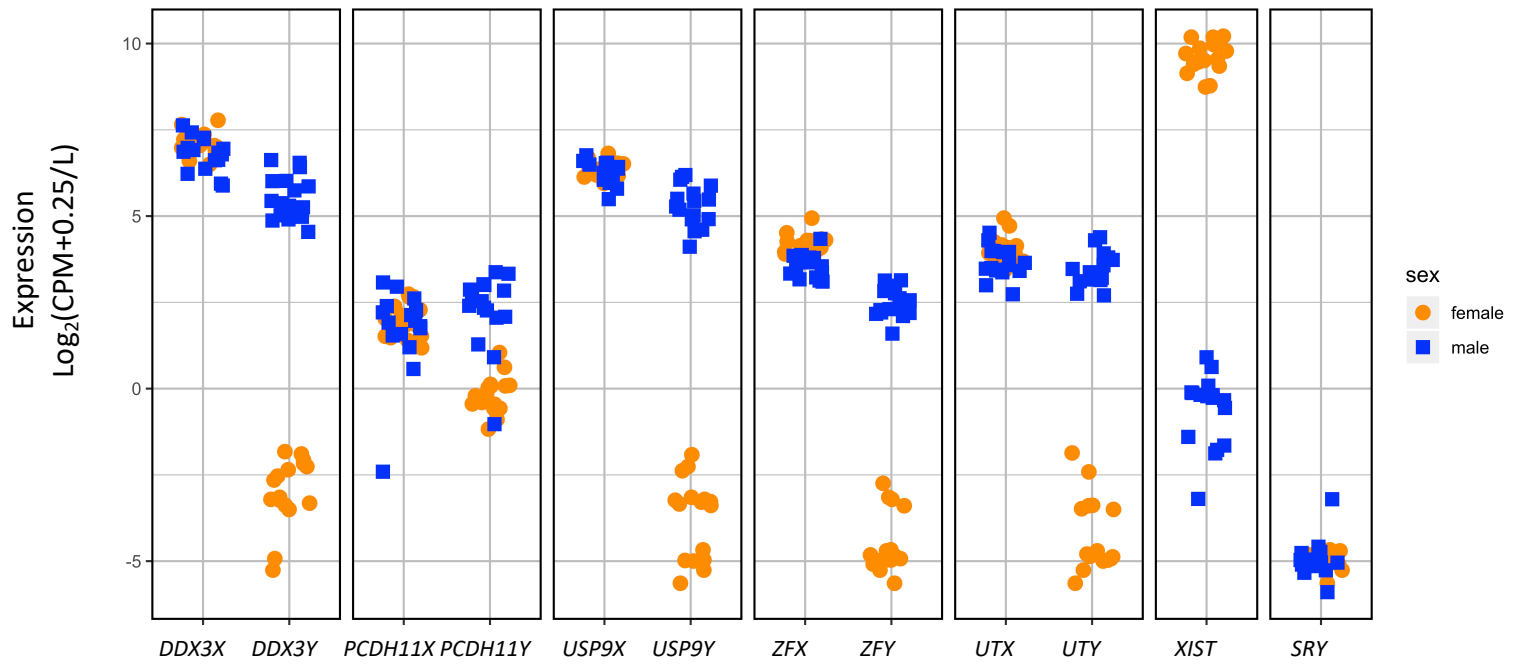

### H BRAIN CORTEX aligned to STAR and sex chromosome complement reference genome

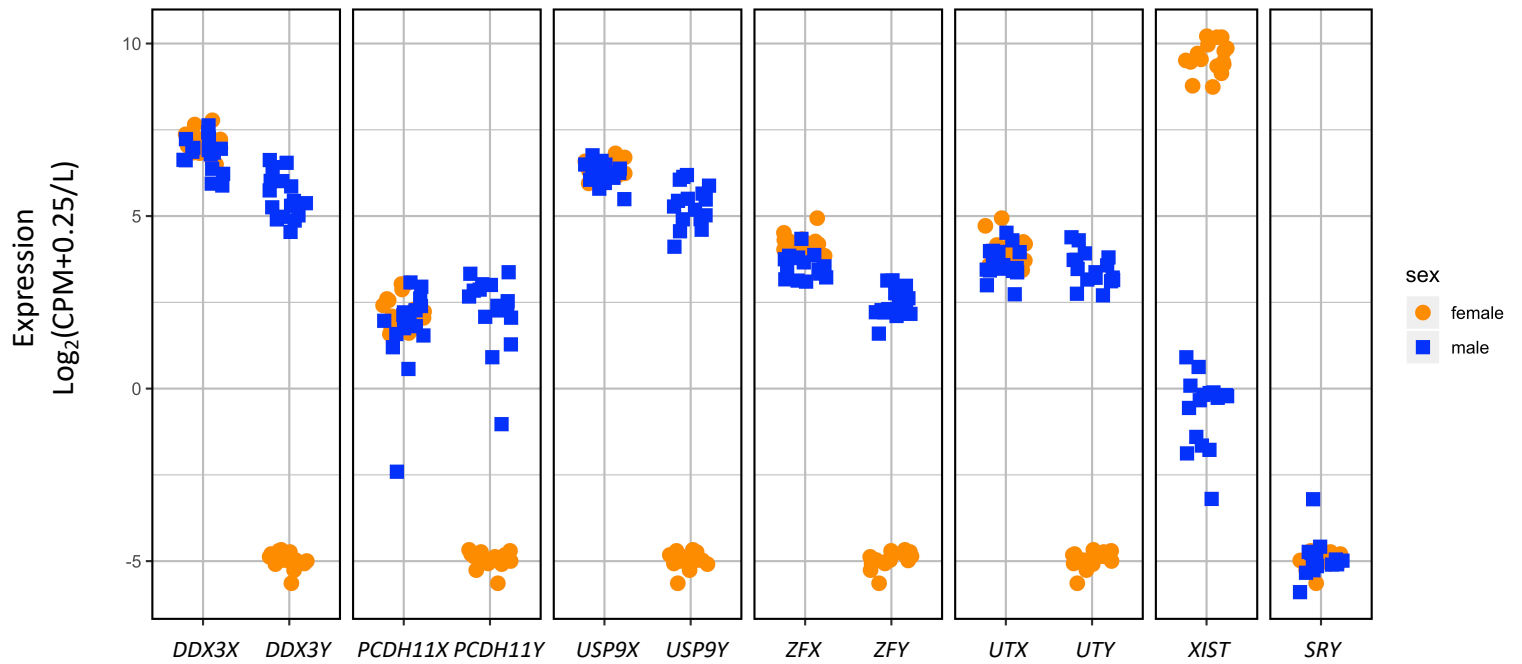

I BREAST aligned to HISAT and default reference genome

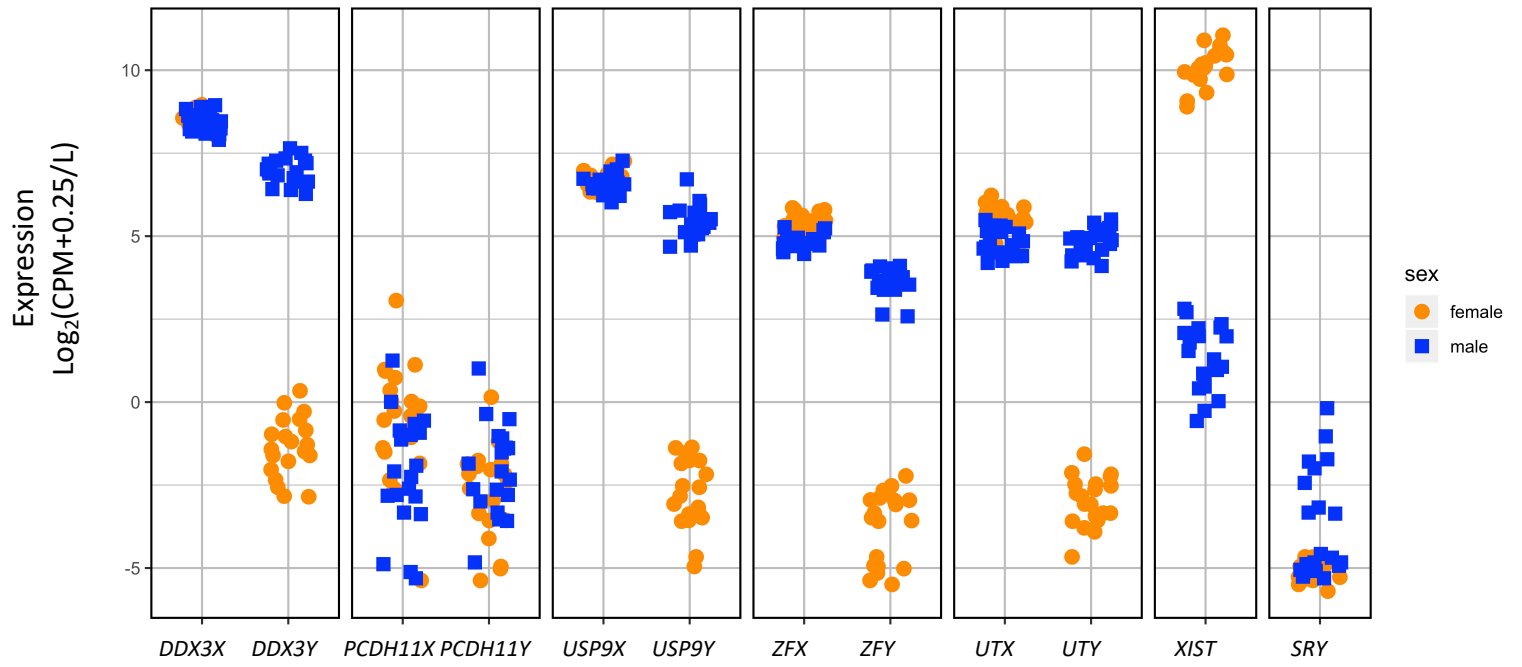

J BREAST aligned to HISAT and sex chromosome complement reference genome

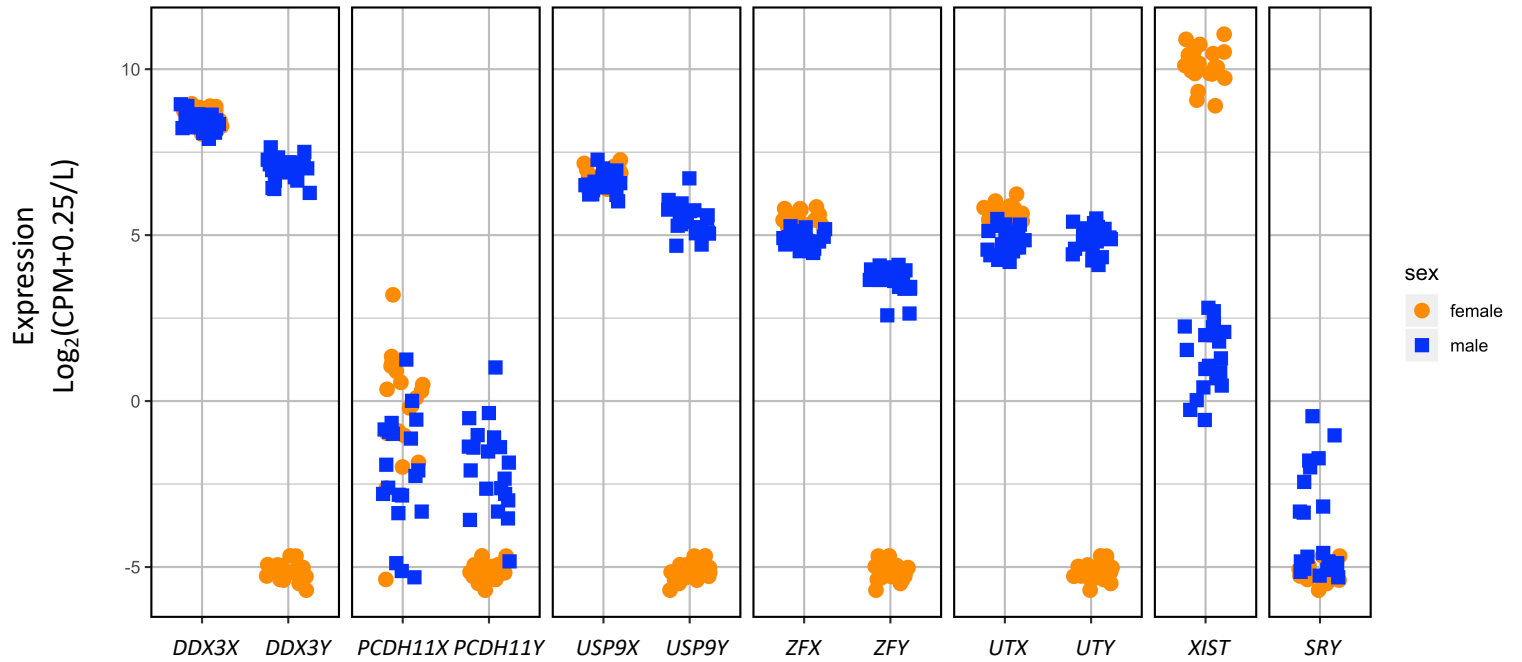

### K BREAST aligned to STAR and default reference genome

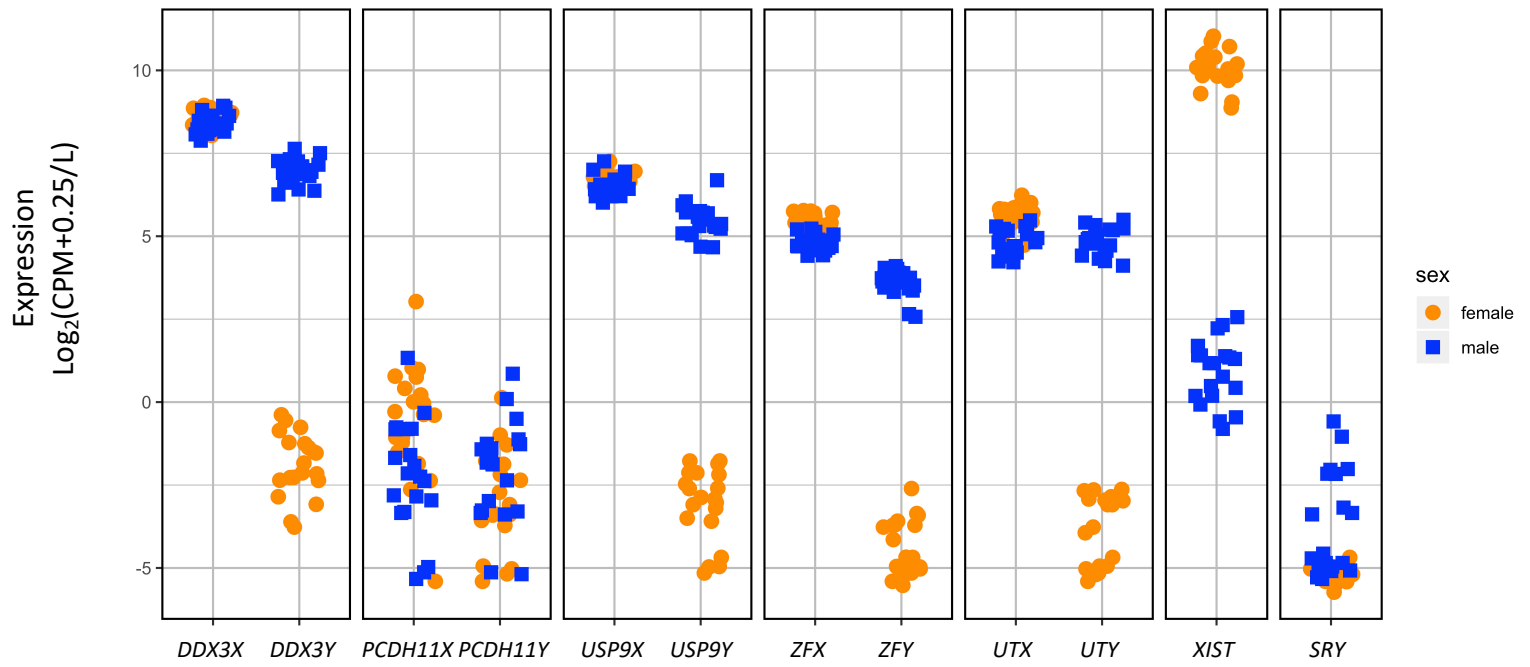

### L BREAST aligned to STAR and sex chromosome complement reference genome

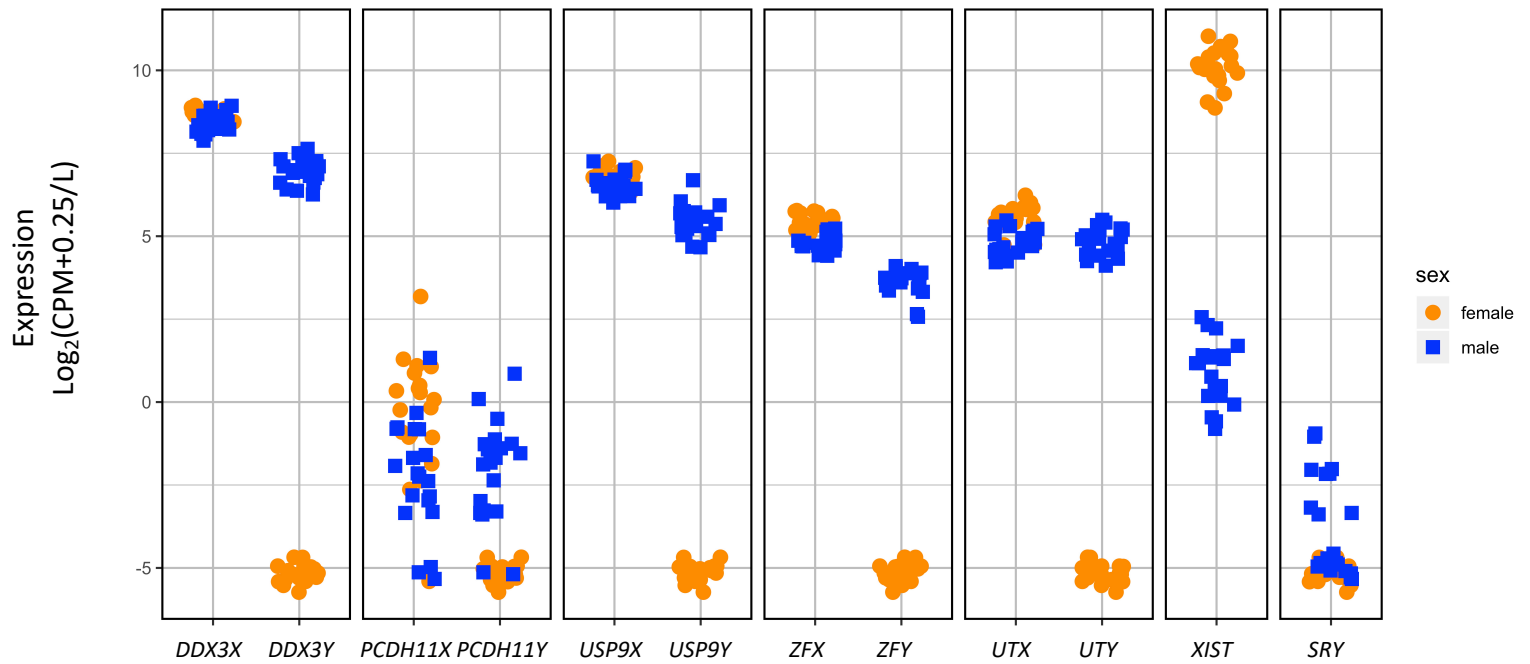

### M LIVER aligned to HISAT and default reference genome

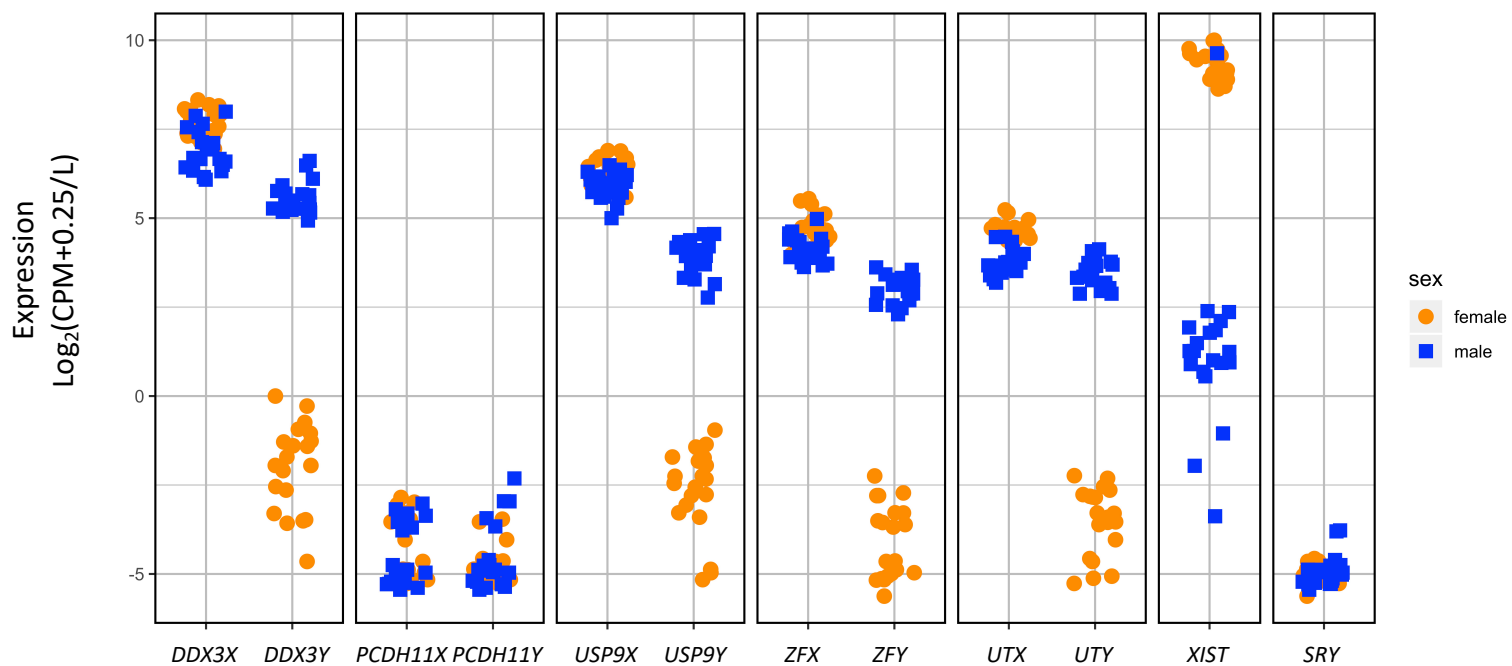

### N LIVER aligned to HISAT and sex chromosome complement reference genome

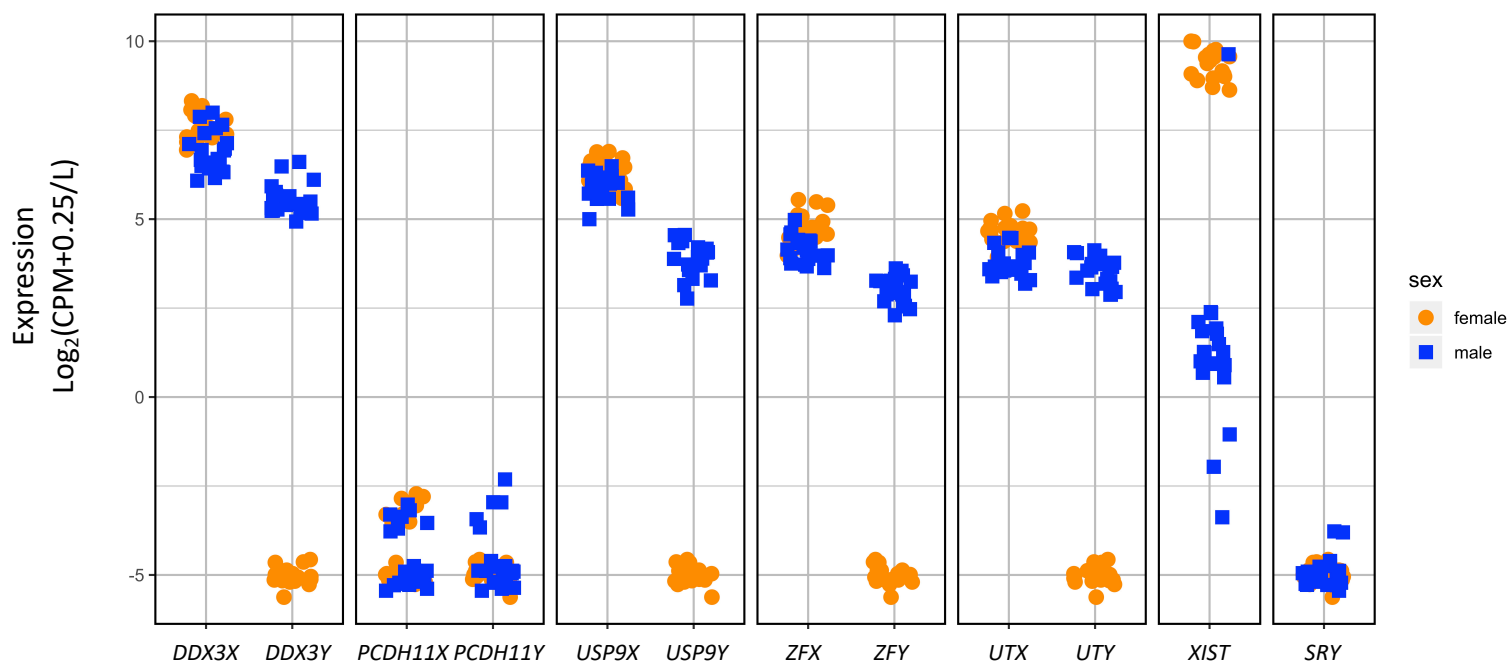

**O** LIVER aligned to STAR and default reference genome

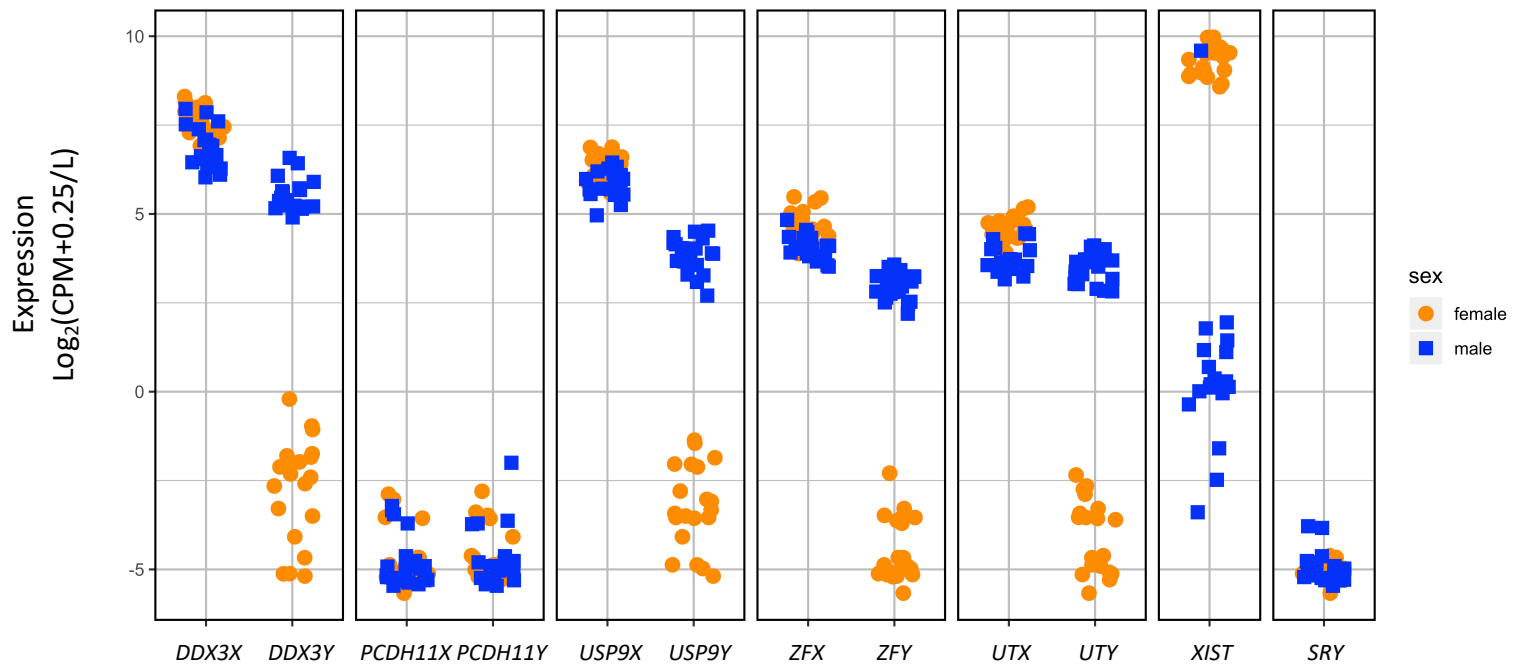

**P** LIVER aligned to STAR and sex chromosome complement reference genome

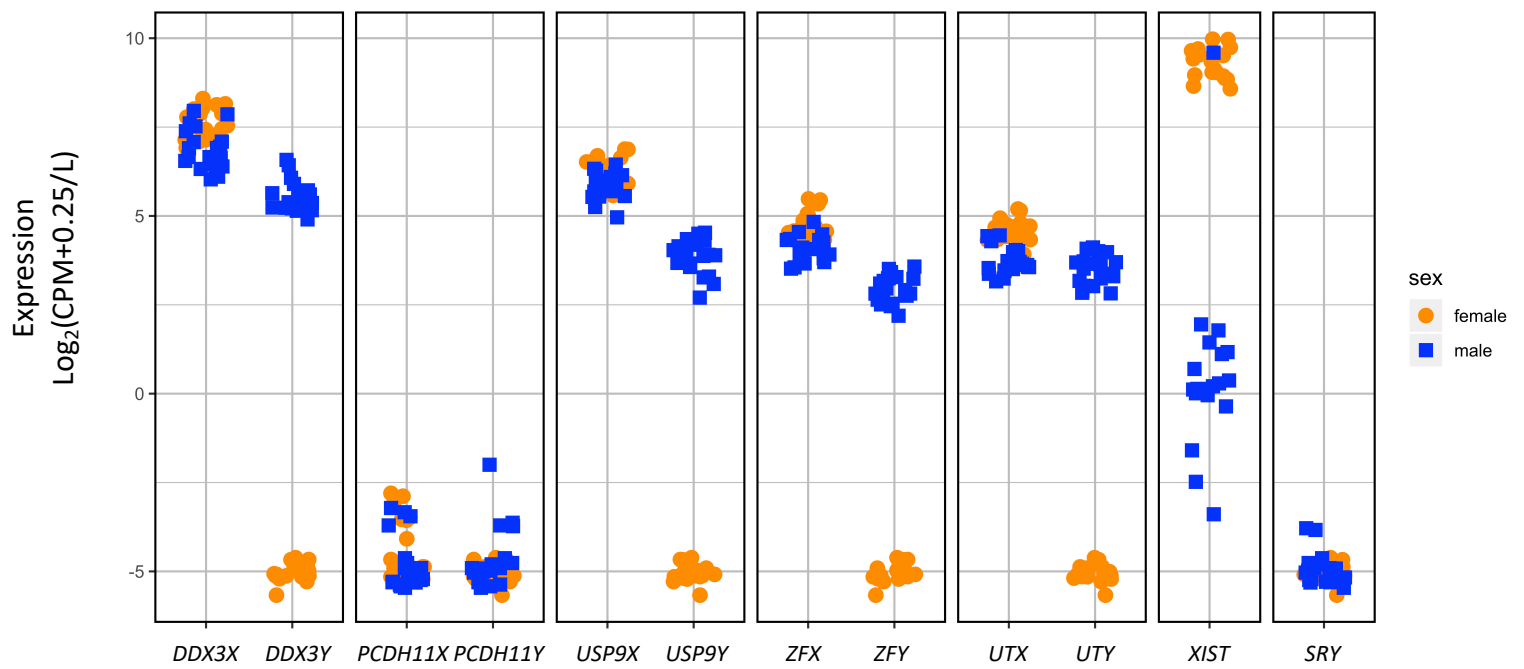



**Q** THYROID aligned to HISAT and default reference genome

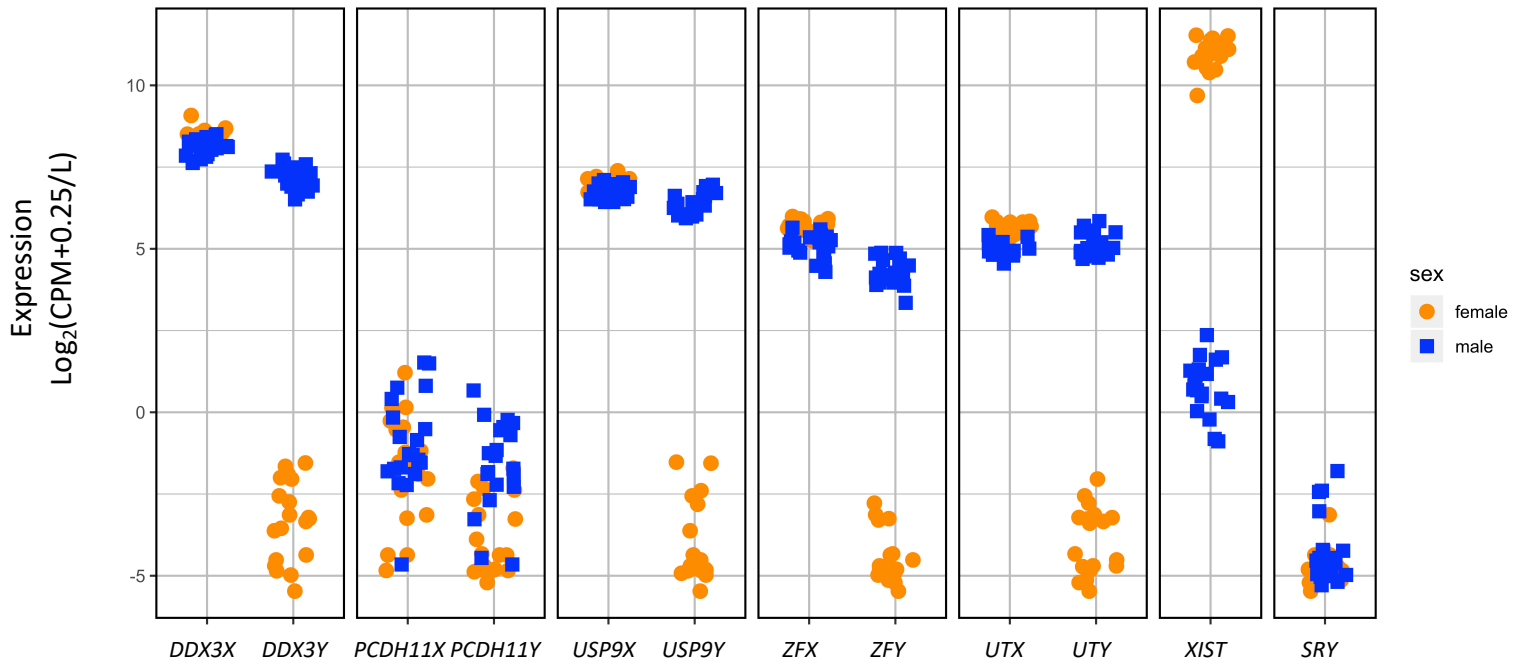

**R** THYROID aligned to HISAT and sex chromosome complement reference genome

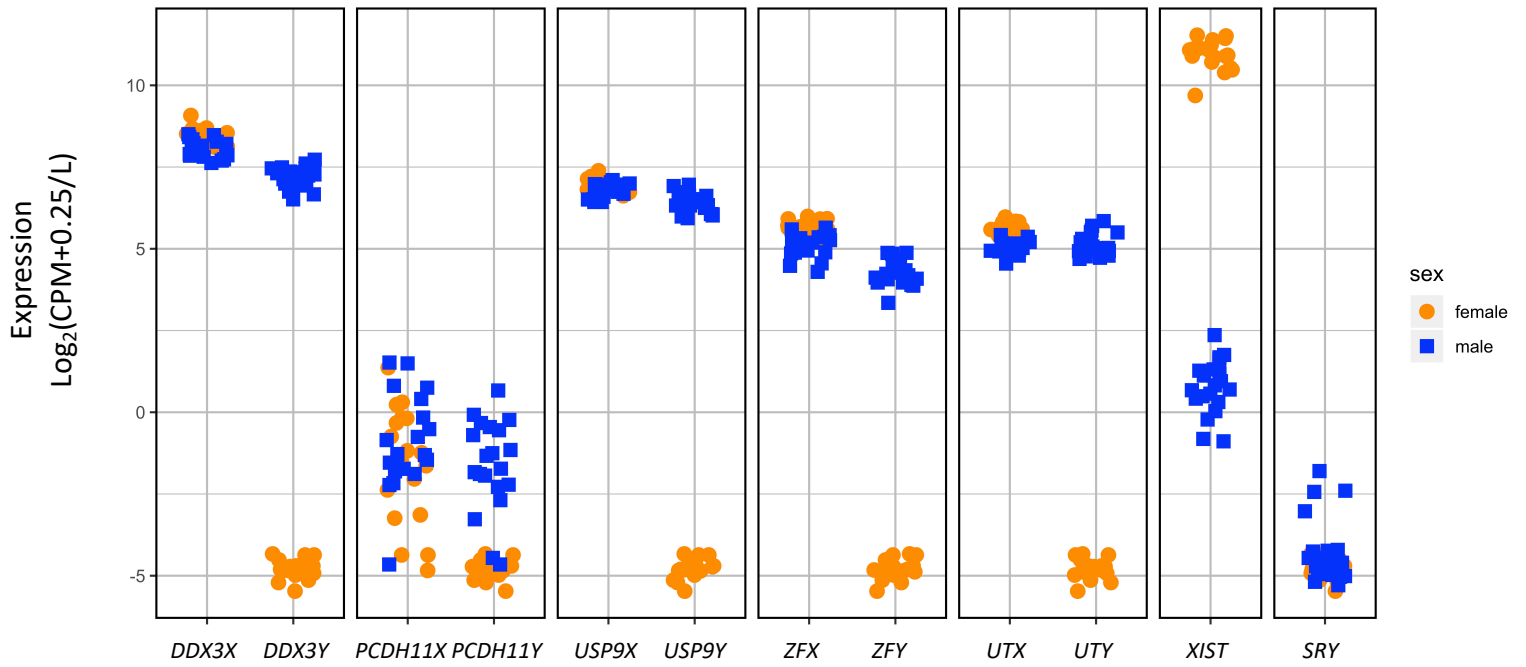

### S THYROID aligned to STAR and default reference genome

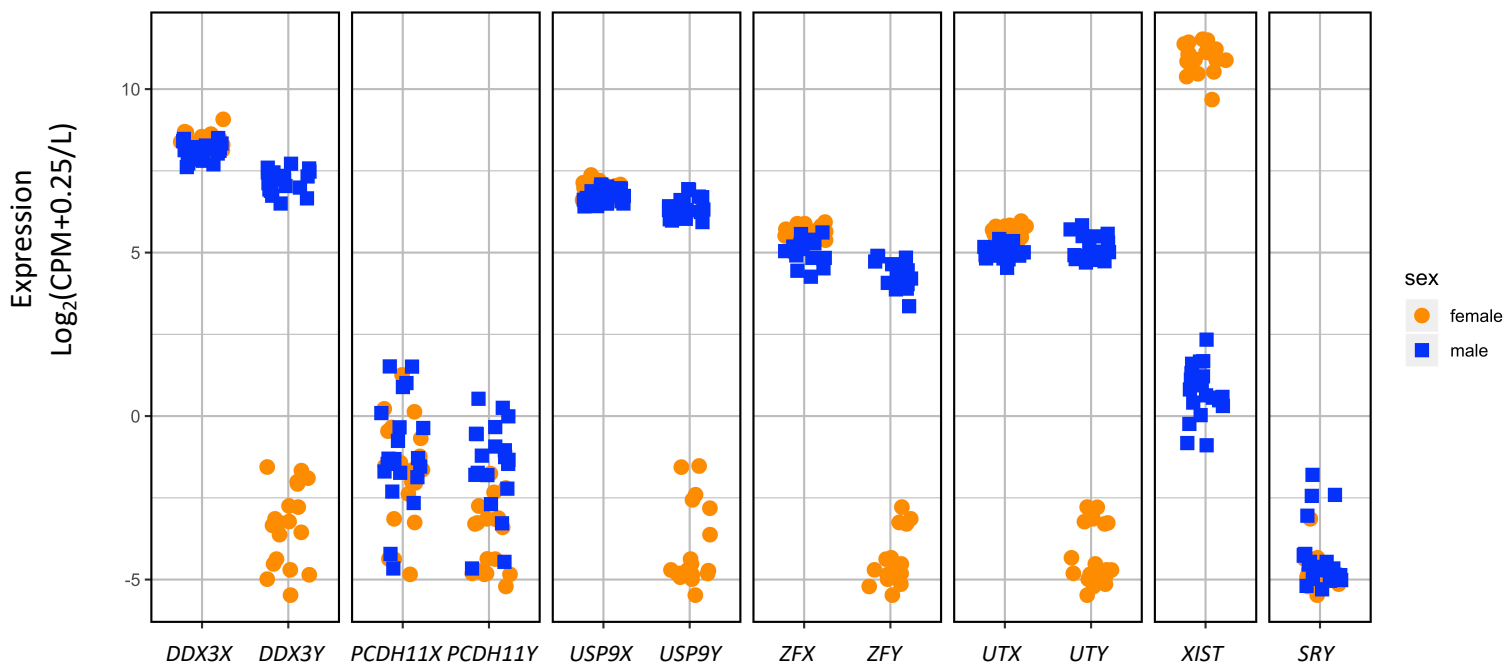

### T THYROID aligned to STAR and sex chromosome complement reference genome

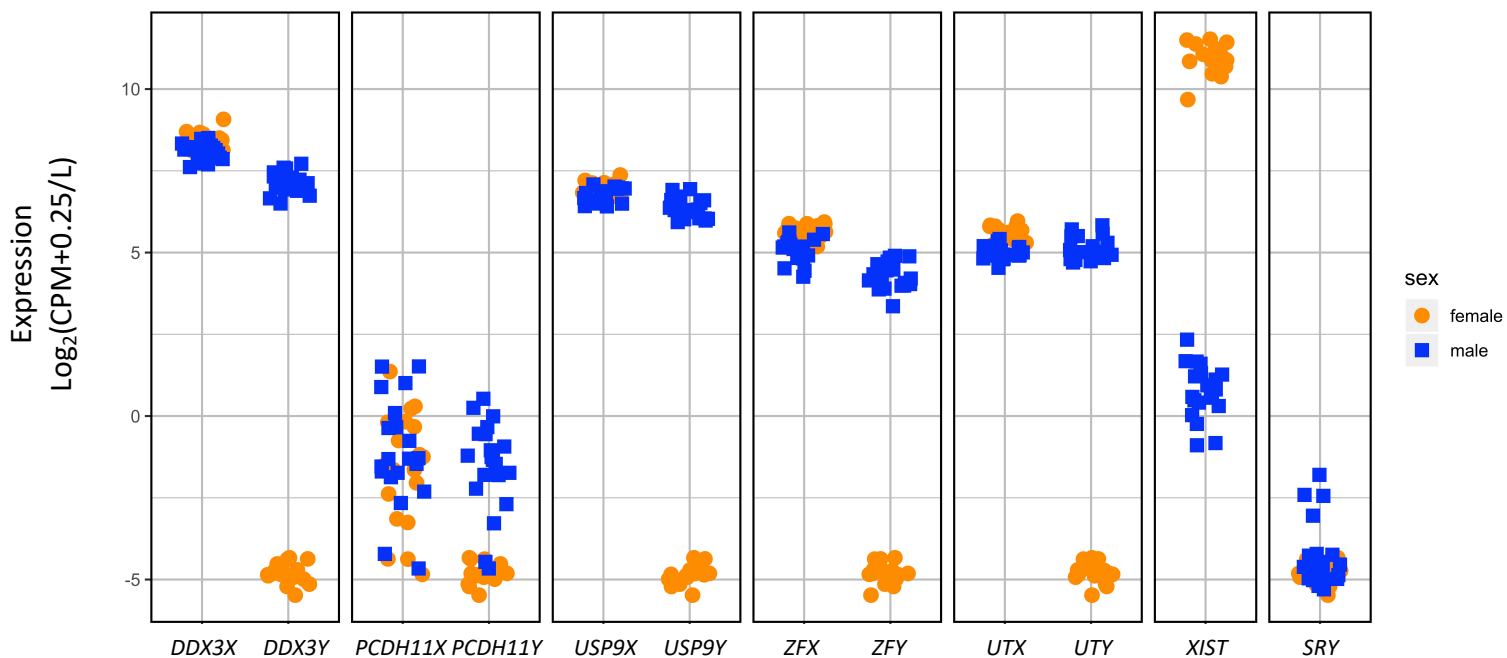

Supplement: 13293_2020_312_MOESM4_ESM.pdf [file 13293_2020_312_MOESM4_ESM.pdf]
