# Supplementary material for: Reference genome and transcriptome informed by the sex chromosome complement of the sample increase ability to detect sex differences in gene expression from RNA-Seq data
Source: PubMed Central journal article supplement (PMC7374973; doi:10.1186/s13293-020-00312-9), 2020-07-21

**A**

## X chromosome gene expression differences for blood samples aligned using HISAT2

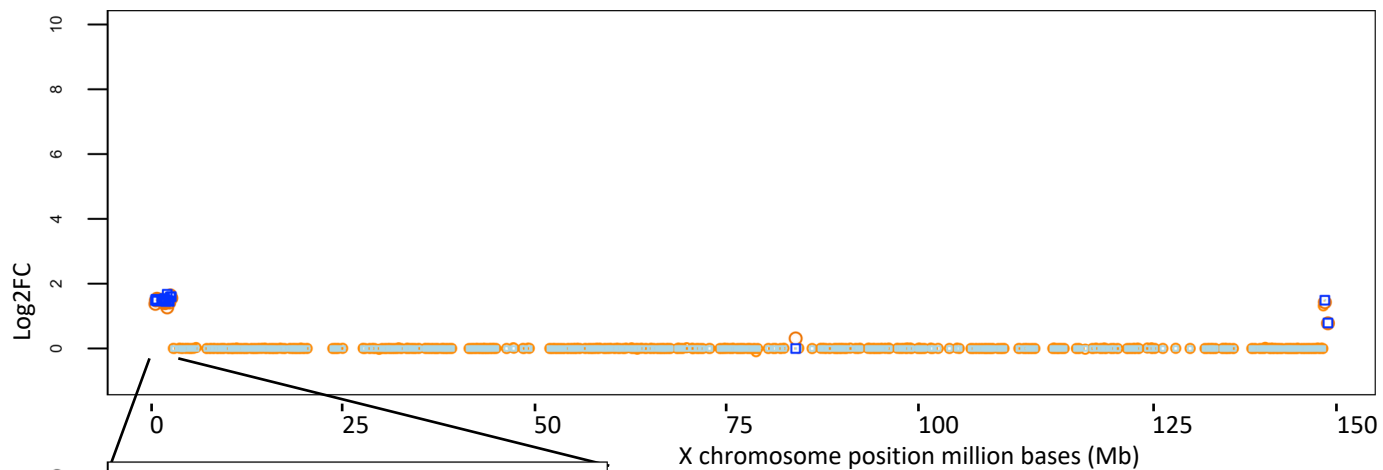**B**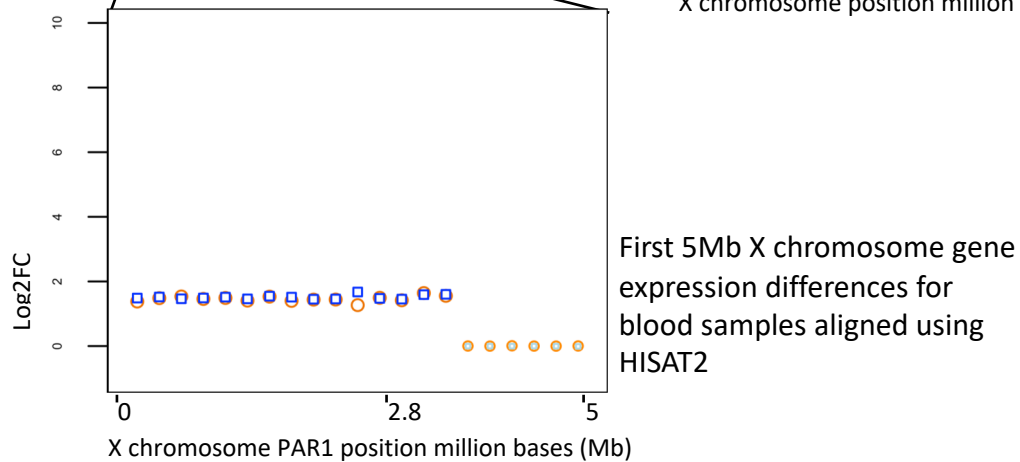**C**

## X chromosome gene expression differences for blood samples aligned using STAR2

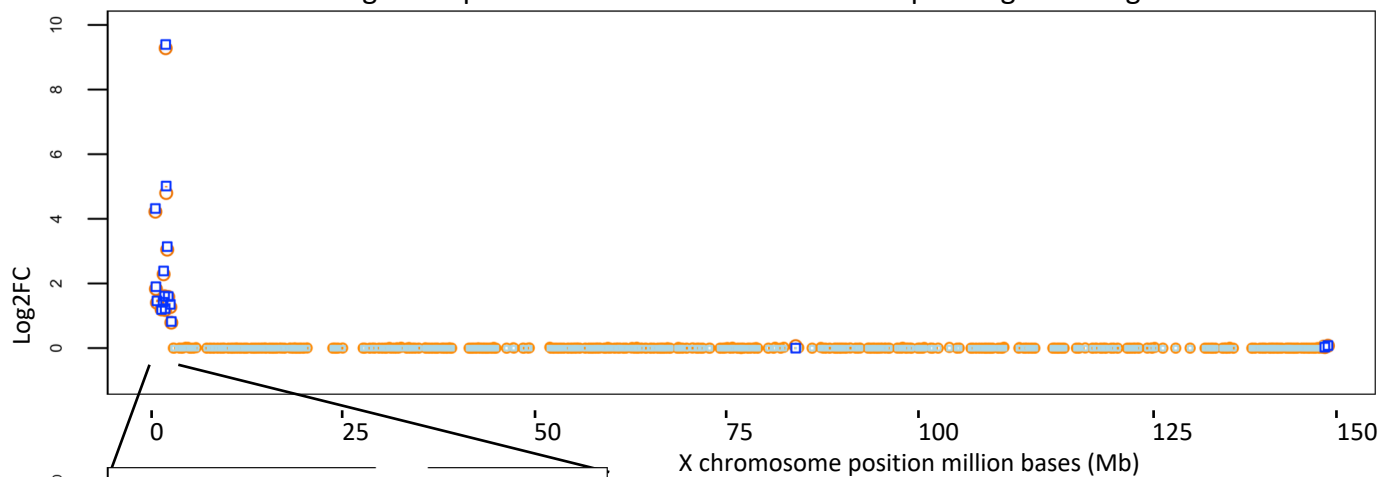**D**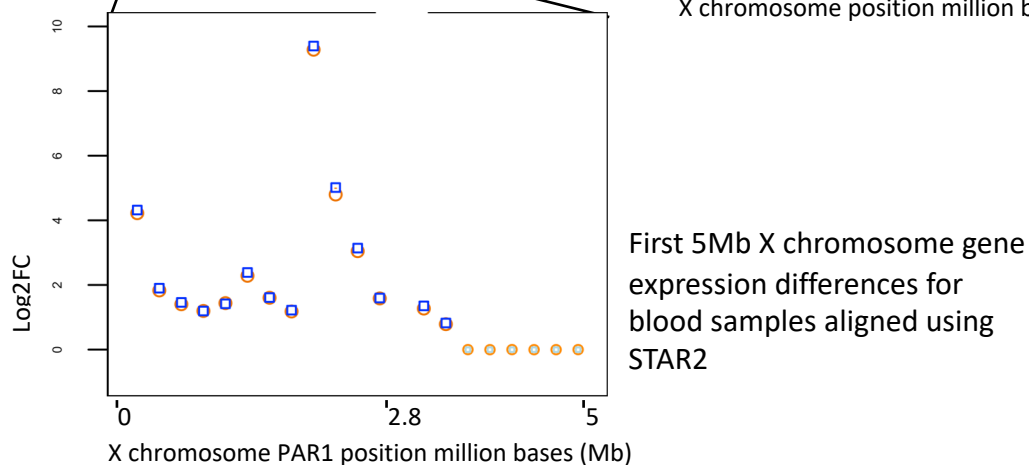

**E**

X chromosome gene expression differences for brain samples aligned using HISAT2

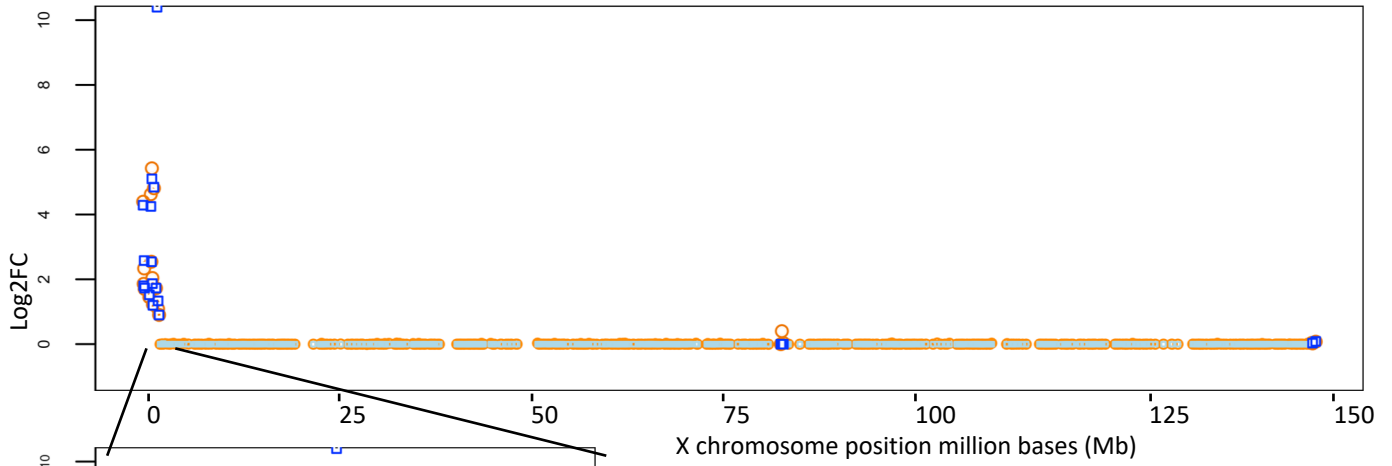**F**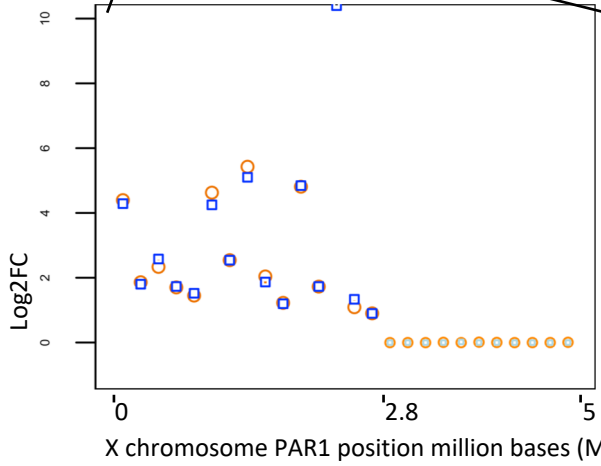

First 5Mb X chromosome gene expression differences for brain samples aligned using HISAT

**G**

X chromosome gene expression differences for brain samples aligned using STAR2

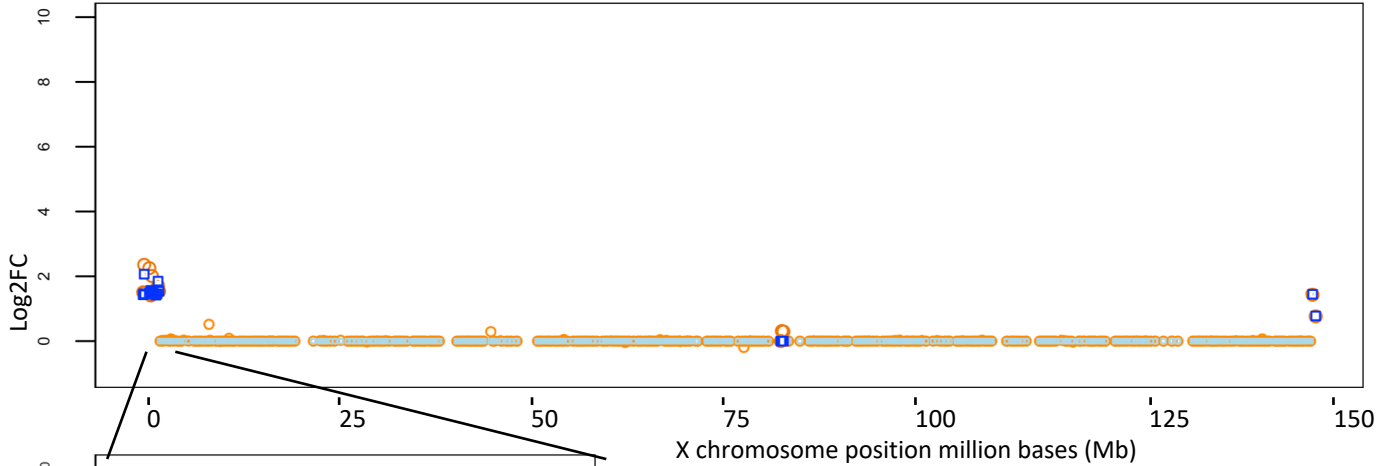**H**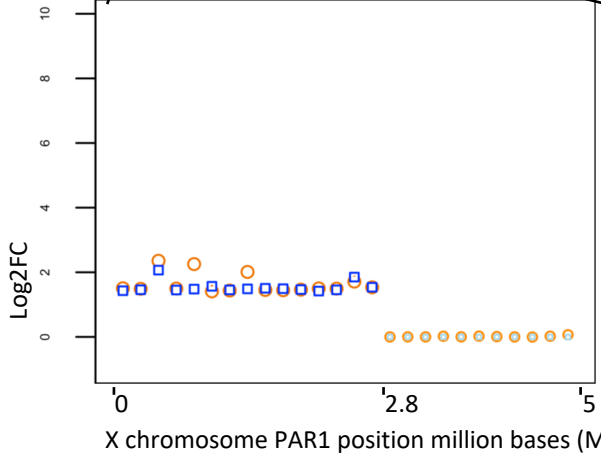

First 5Mb X chromosome gene expression differences for brain samples aligned using STAR2

X chromosome gene expression differences for breast samples aligned using HISAT2

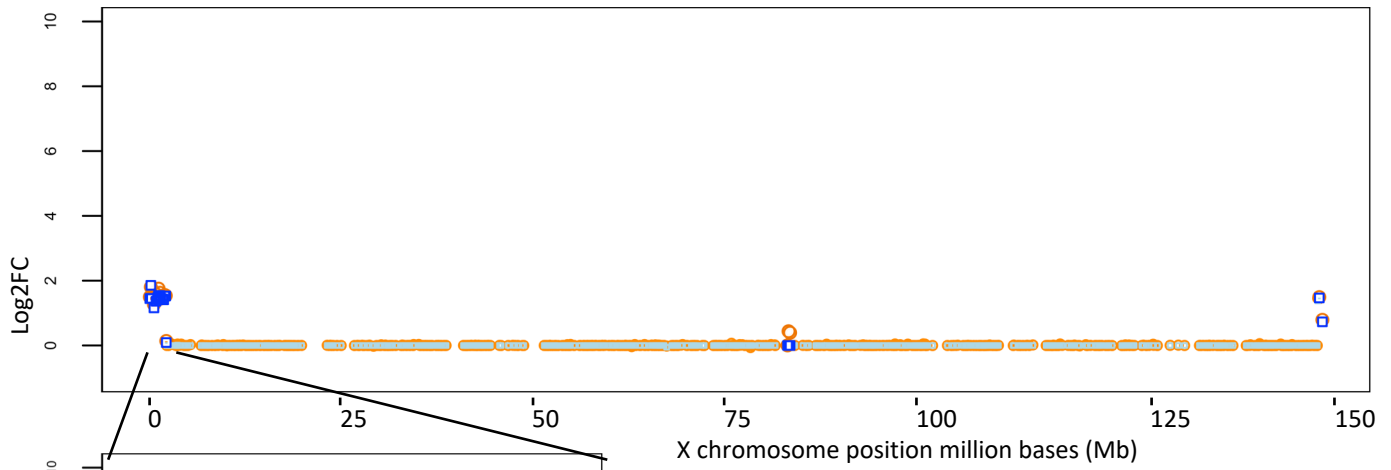

J

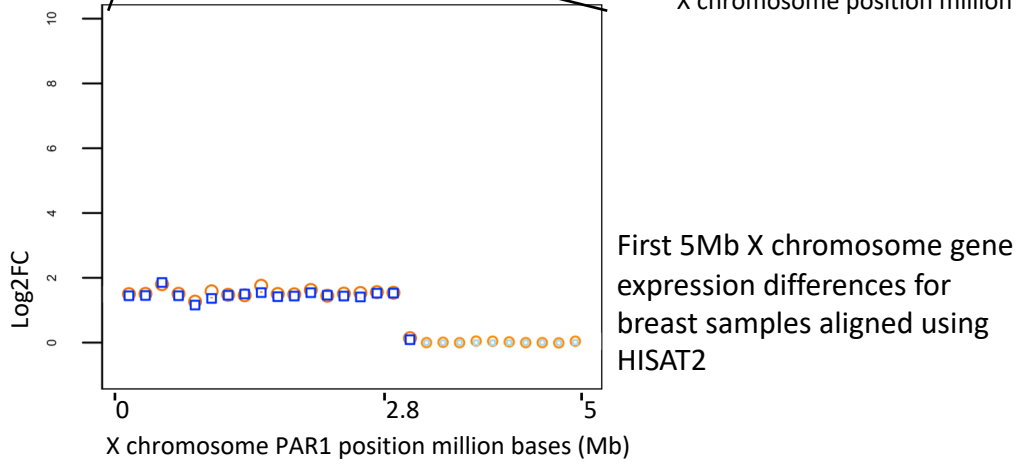

K

X chromosome gene expression differences for breast samples aligned using STAR2

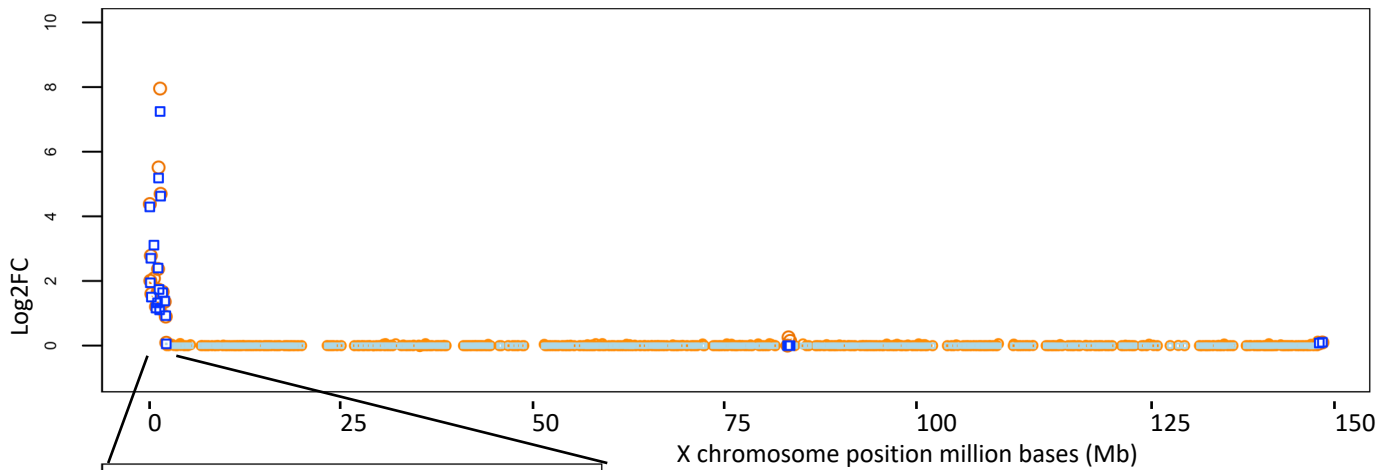

L

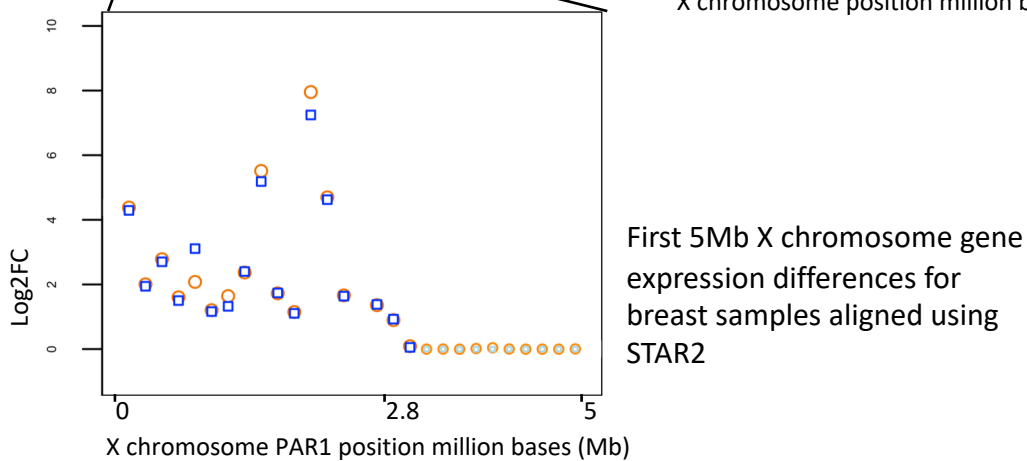

**M**

X chromosome gene expression differences for liver samples aligned using HISAT2

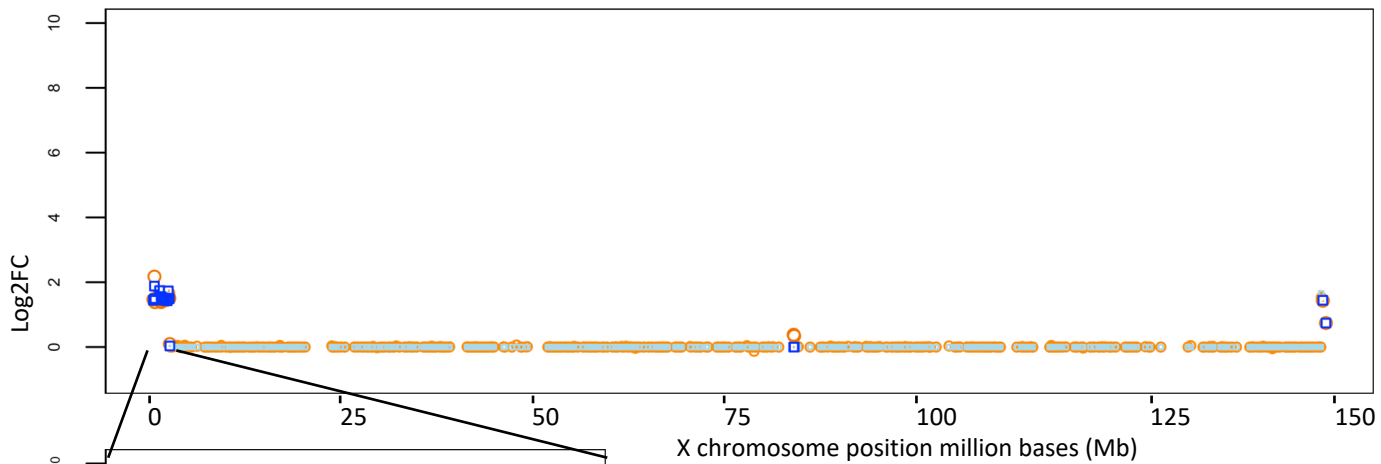**N**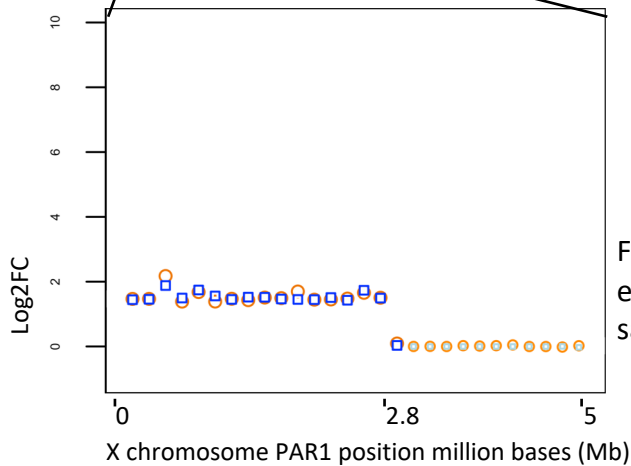

First 5Mb X chromosome gene expression differences for liver samples aligned using HISAT2

**O**

X chromosome gene expression differences for liver samples aligned using STAR2

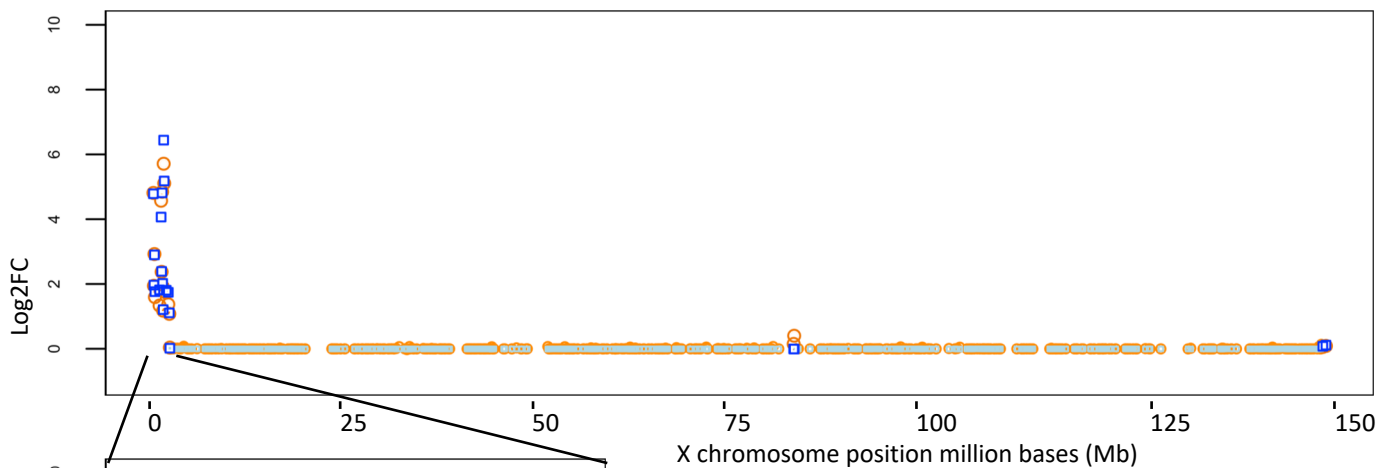**P**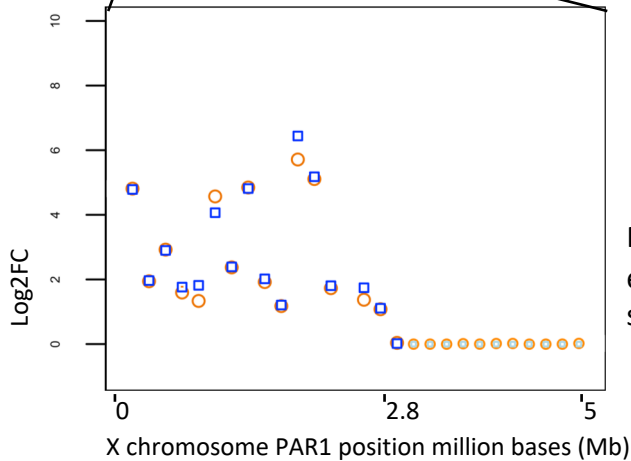

First 5Mb X chromosome gene expression differences for liver samples aligned using STAR2

**Q**

X chromosome gene expression differences for thyroid samples aligned using HISAT2

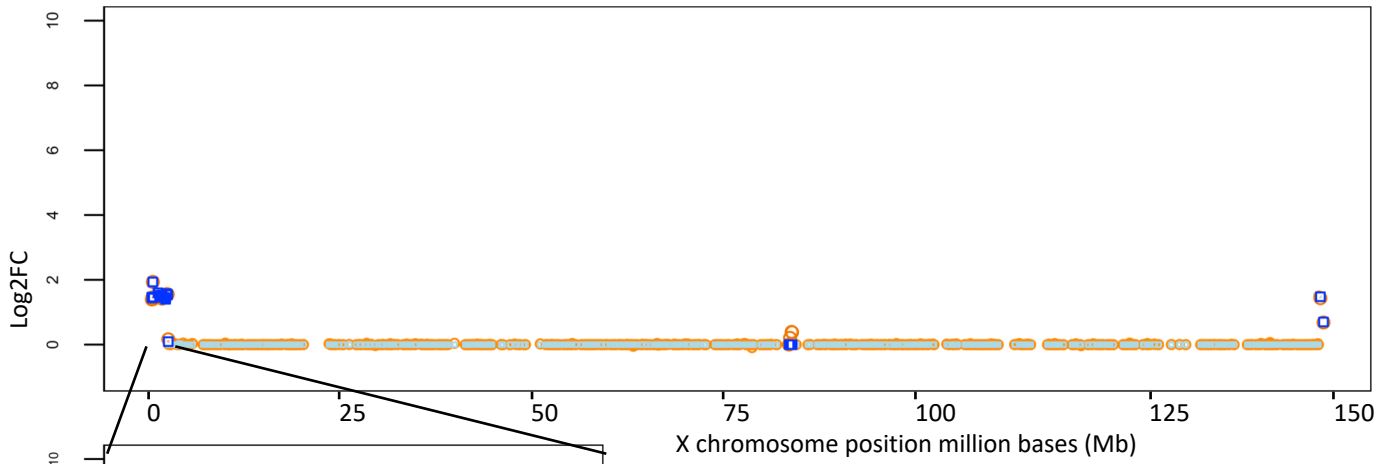**R**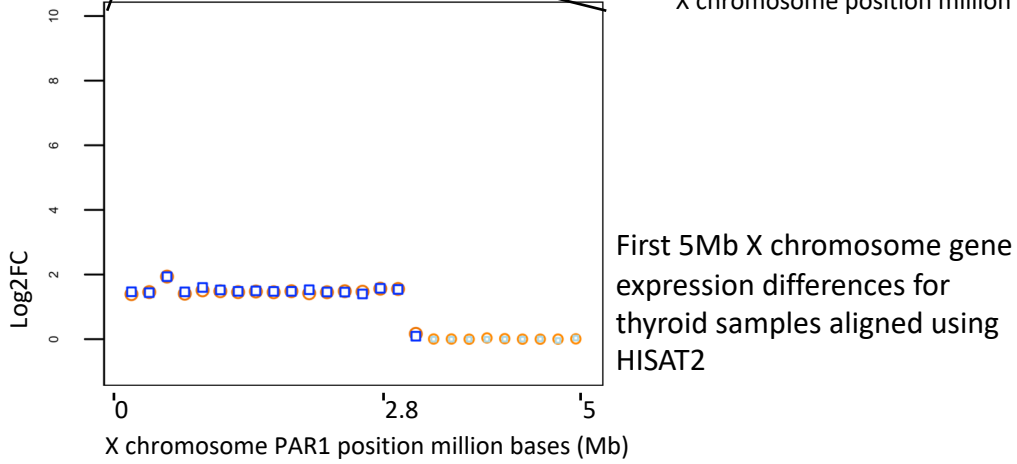**S**

X chromosome gene expression differences for thyroid samples aligned using STAR2

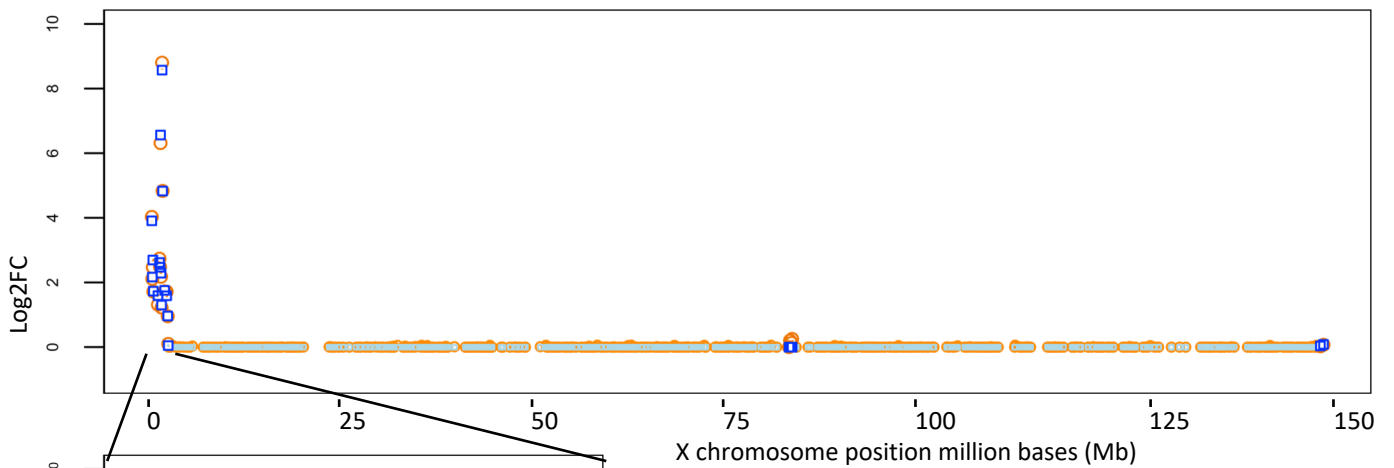**T**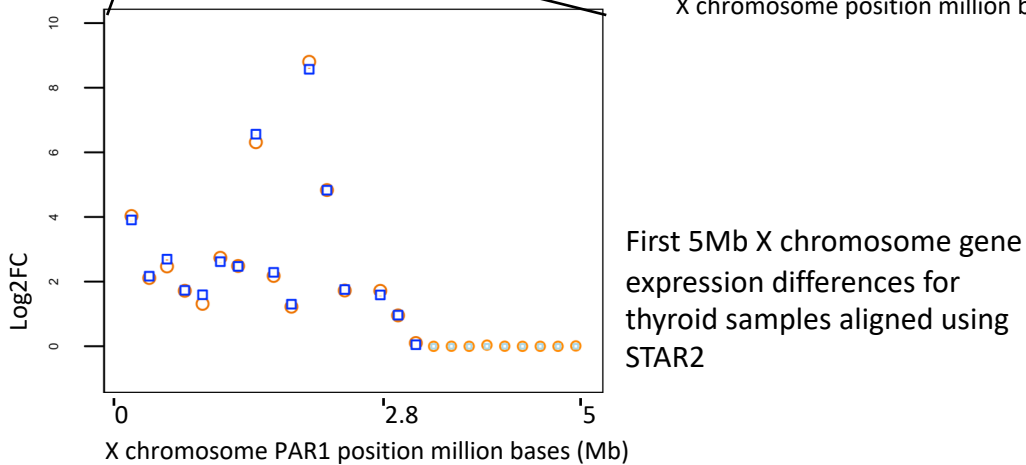

Supplement: 13293_2020_312_MOESM10_ESM.pdf [file 13293_2020_312_MOESM10_ESM.pdf]
