# Supplementary material for: Reference genome and transcriptome informed by the sex chromosome complement of the sample increase ability to detect sex differences in gene expression from RNA-Seq data
Source: PubMed Central journal article supplement (PMC7374973; doi:10.1186/s13293-020-00312-9), 2020-07-21

**A** Gene expression differences between male XY and female XX blood samples aligned using HISAT

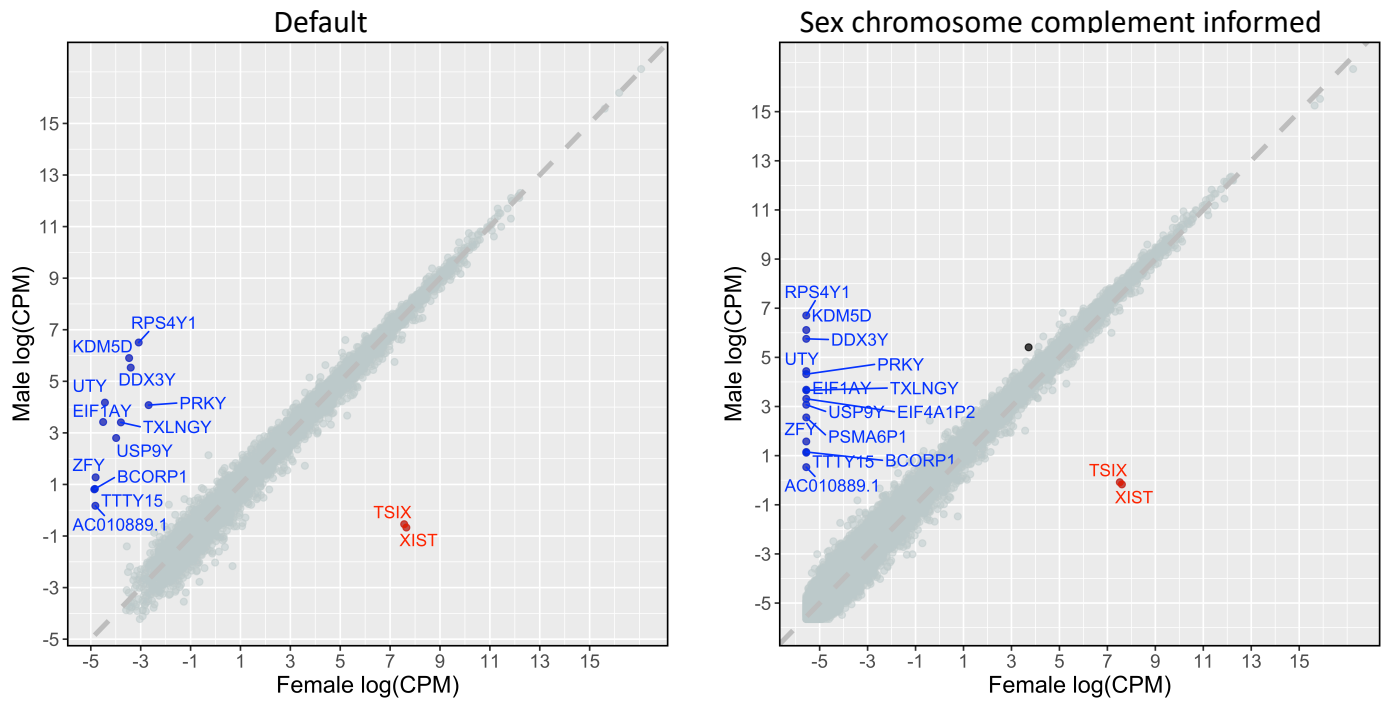

**B** Gene expression differences between male XY and female XX blood samples aligned using STAR

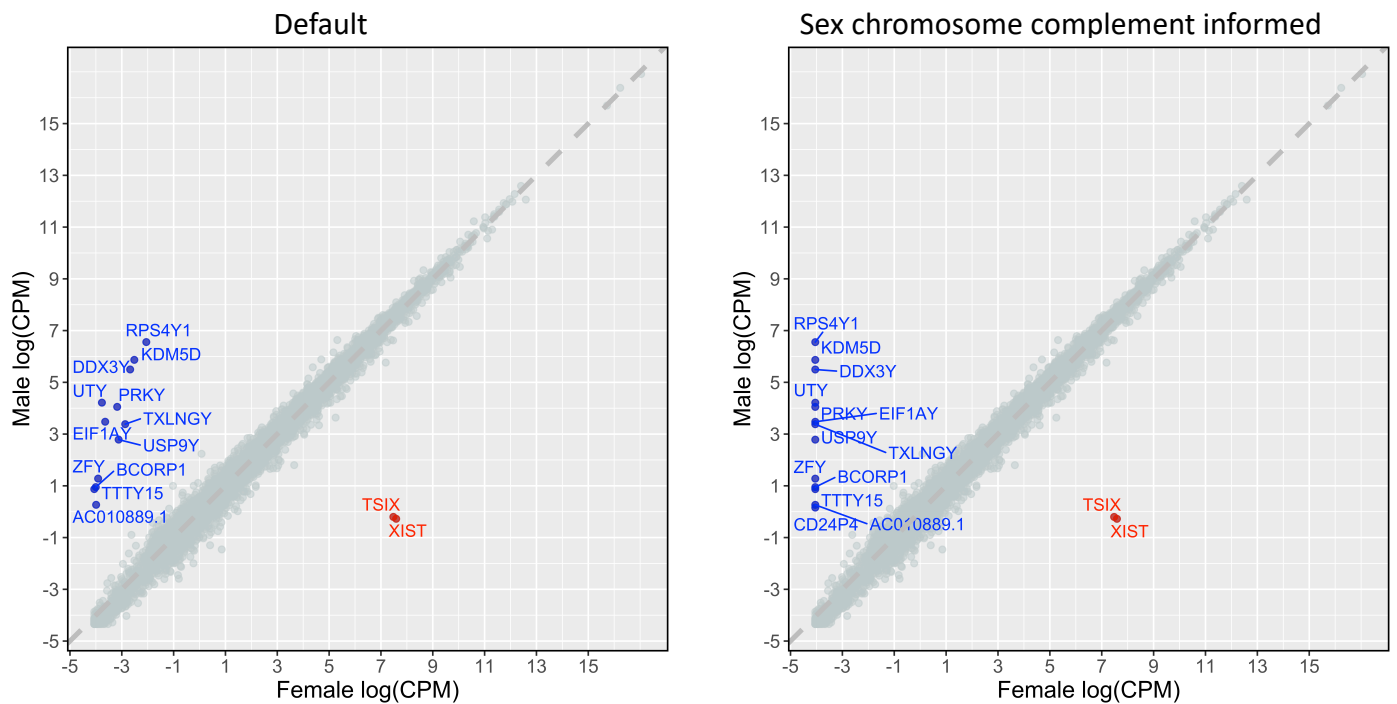

**C** Gene expression differences between male XY and female XX brain samples aligned using HISAT

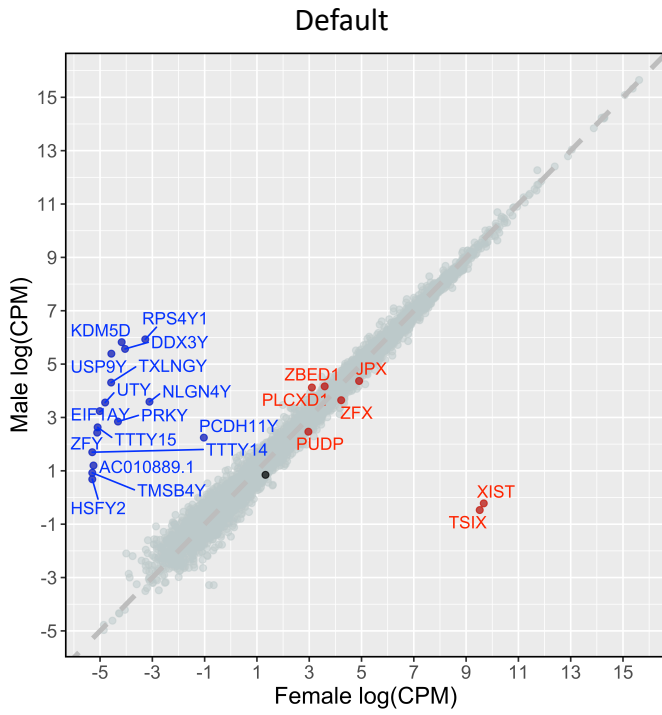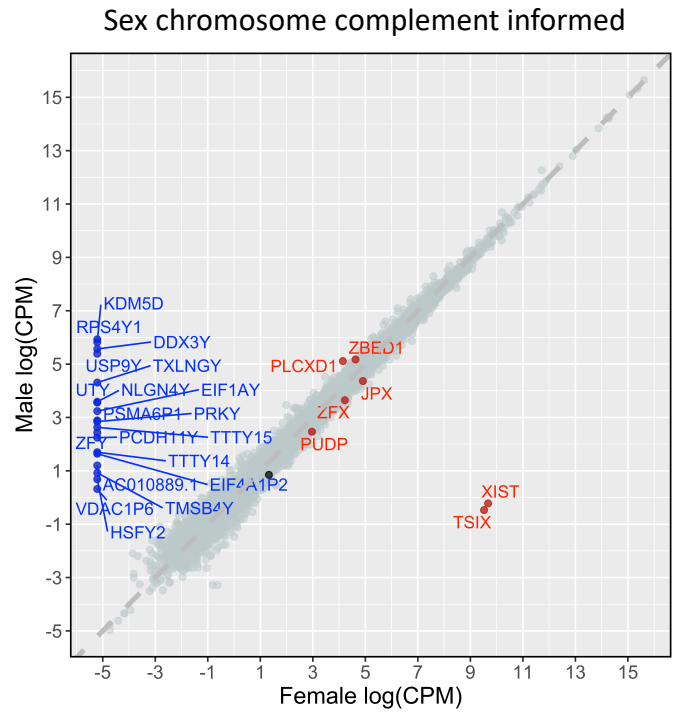

**D** Gene expression differences between male XY and female XX brain samples aligned using STAR

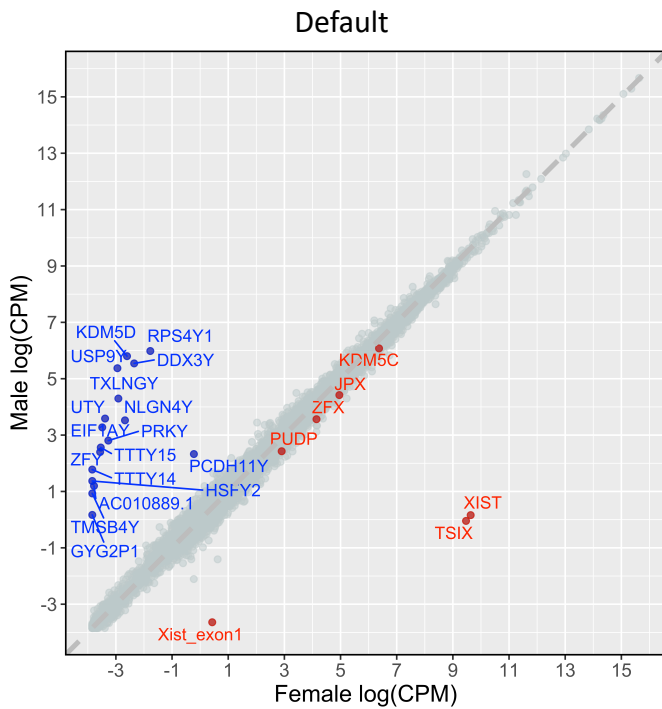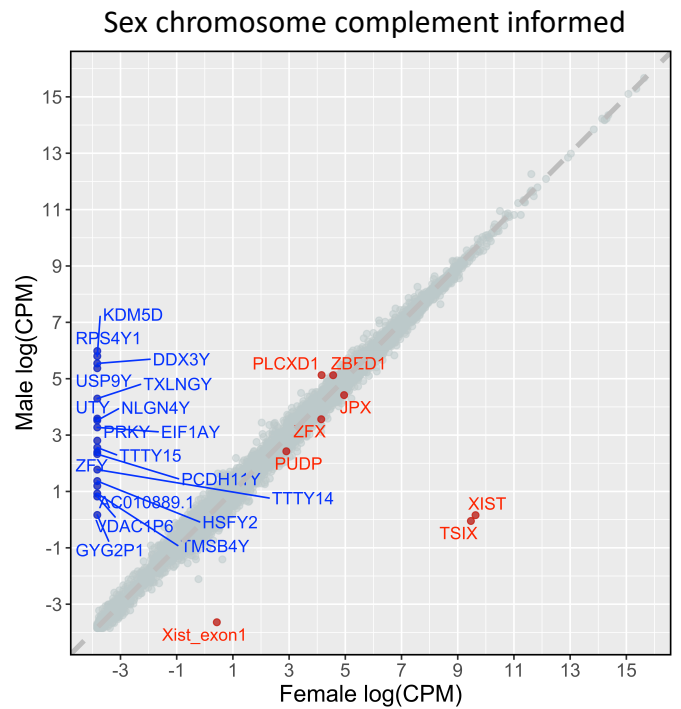

**E** Gene expression differences between male XY and female XX breast samples aligned using HISAT

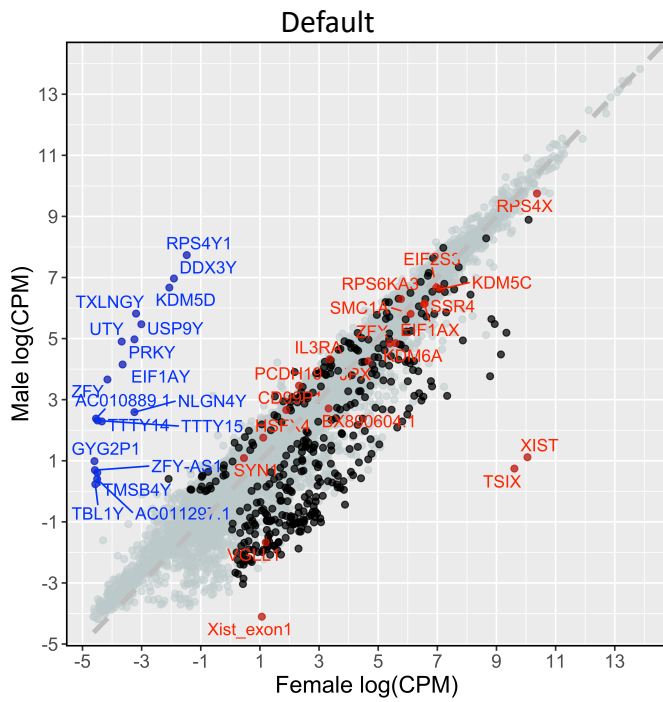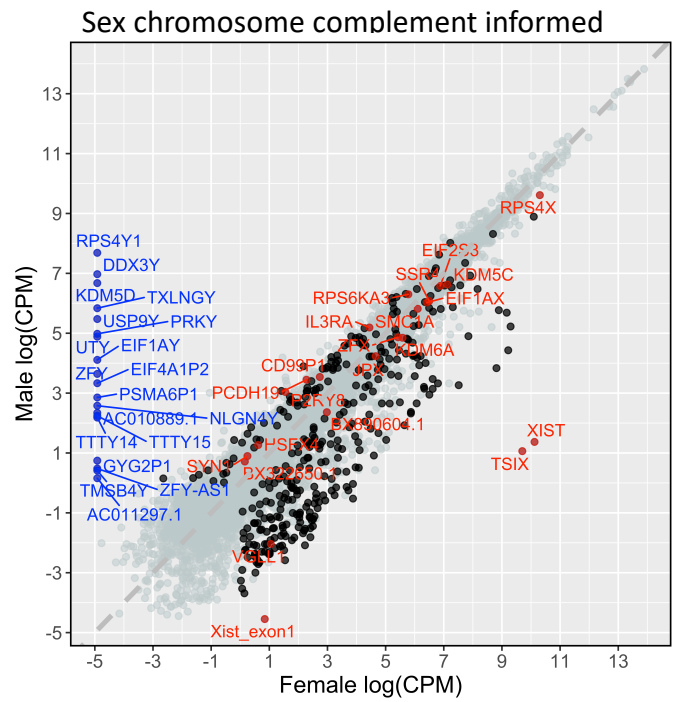

**F** Gene expression differences between male XY and female XX breast samples aligned using STAR

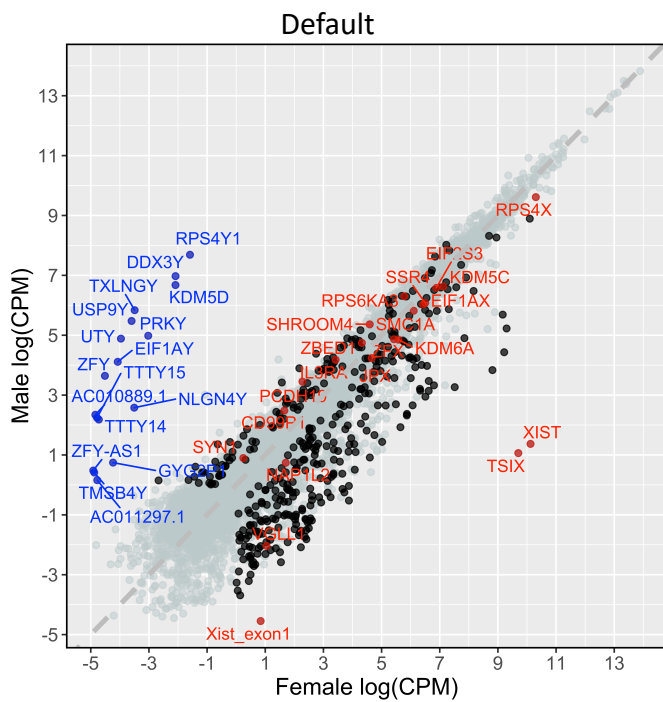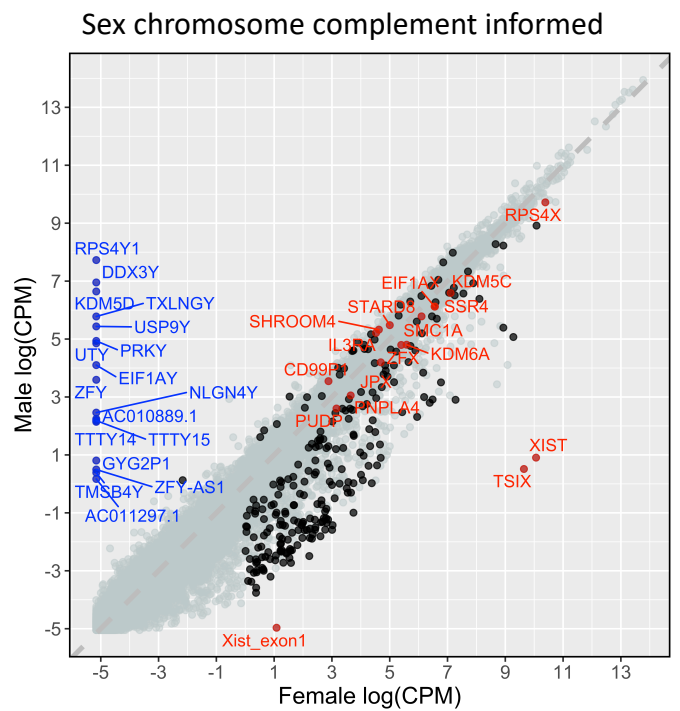

### G Gene expression differences between male XY and female XX liver samples aligned using HISAT

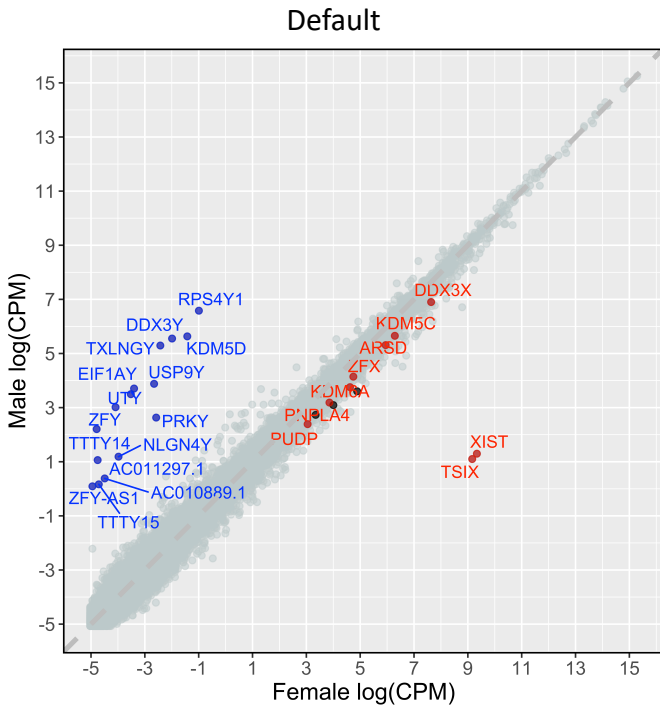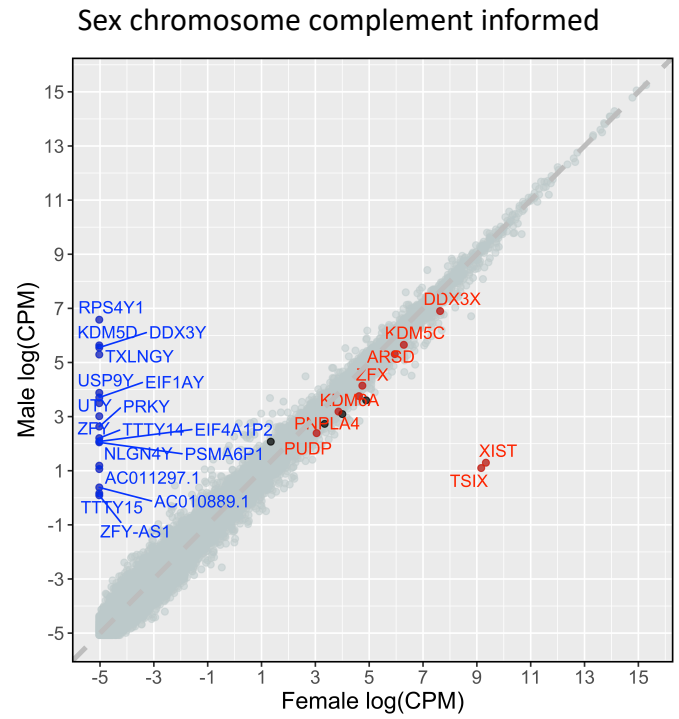

### H Gene expression differences between male XY and female XX liver samples aligned using STAR

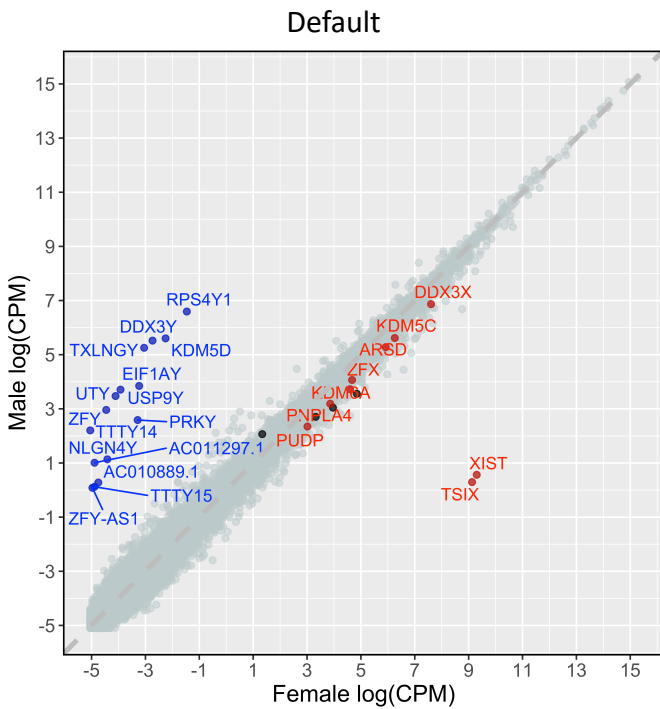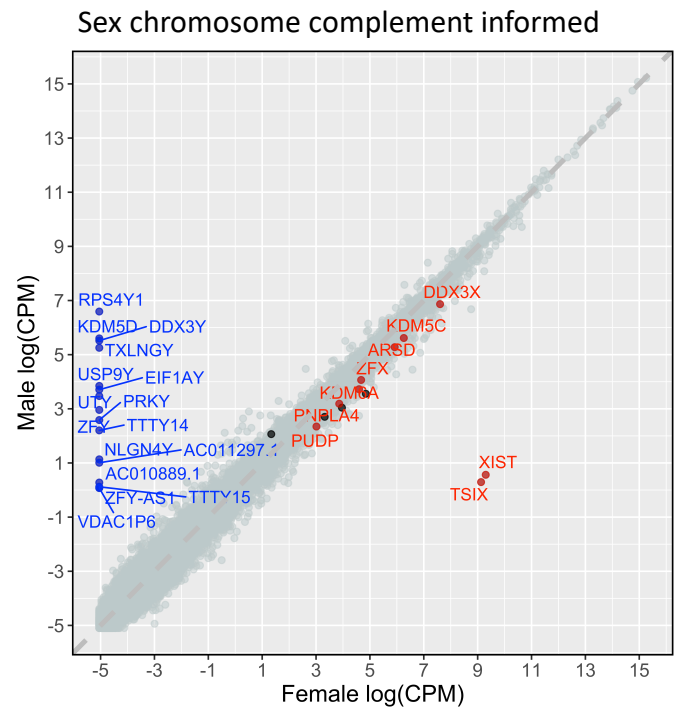

I Gene expression differences between male XY and female XX thyroid samples aligned using HISAT

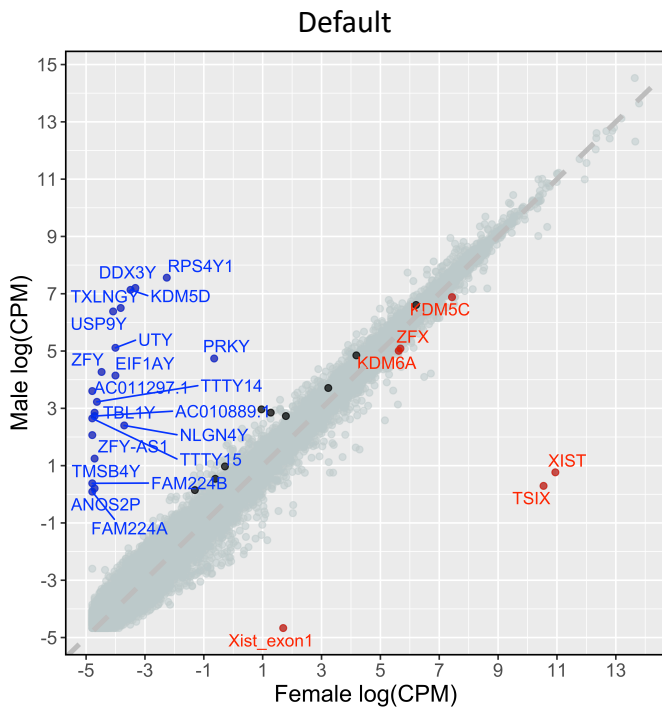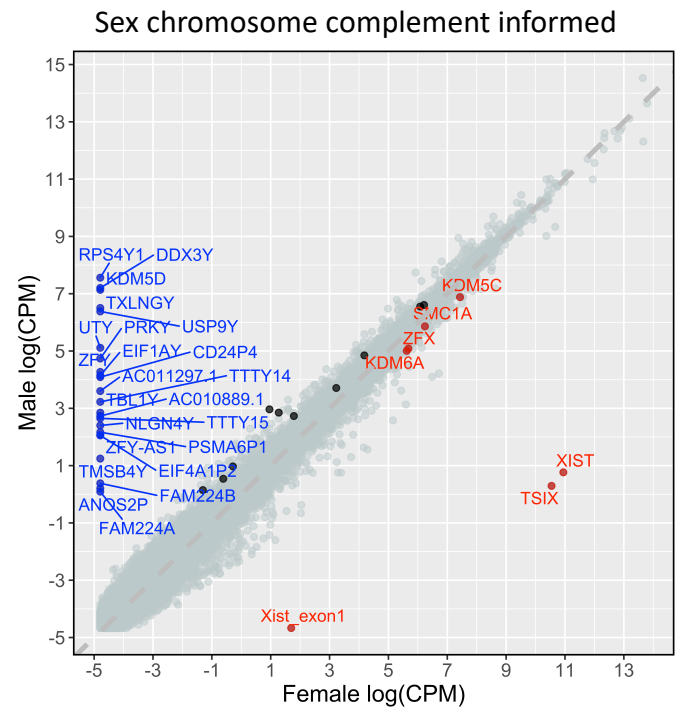

J Gene expression differences between male XY and female XX thyroid samples aligned using STAR

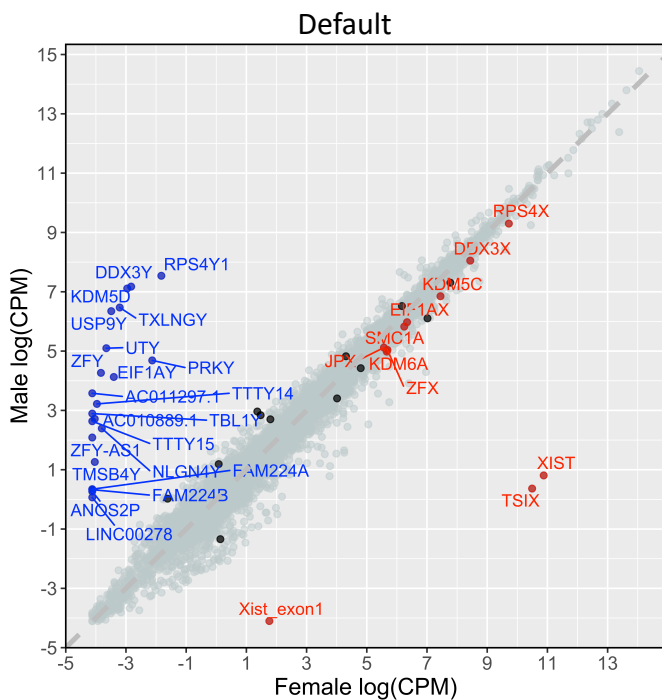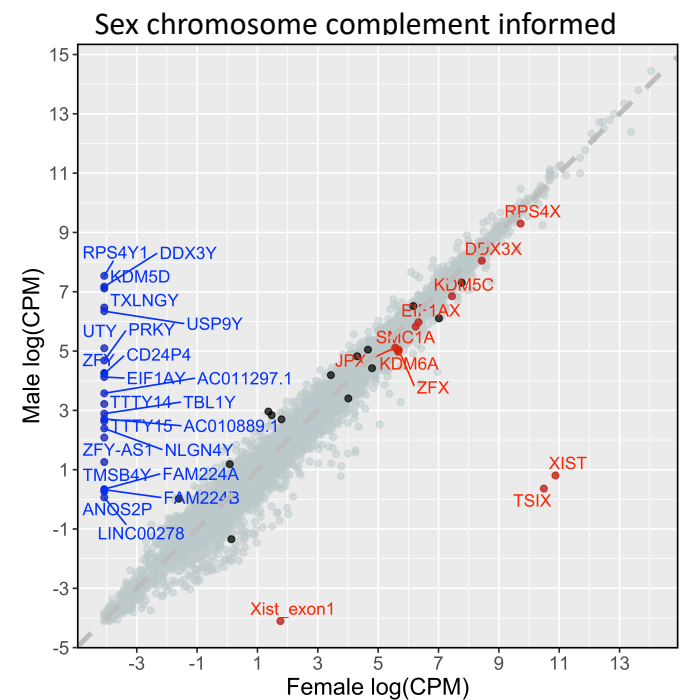

Supplement: 13293_2020_312_MOESM15_ESM.pdf [file 13293_2020_312_MOESM15_ESM.pdf]
