# Supplementary material for: Reference genome and transcriptome informed by the sex chromosome complement of the sample increase ability to detect sex differences in gene expression from RNA-Seq data
Source: PubMed Central journal article supplement (PMC7374973; doi:10.1186/s13293-020-00312-9), 2020-07-21

## A) Blood PC1 & PC2

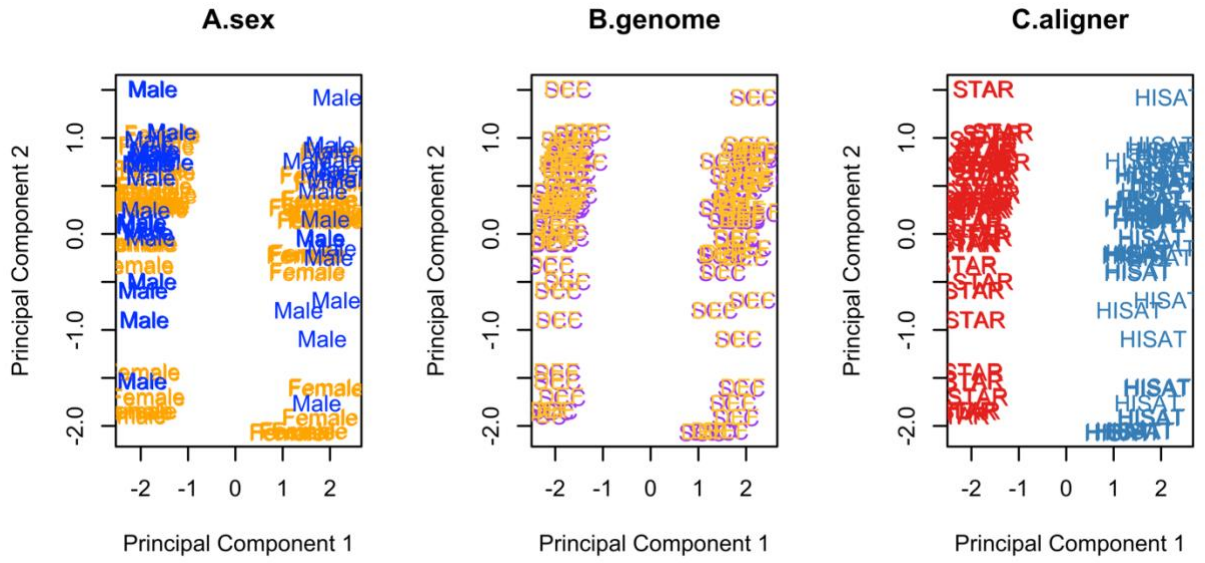

## B) Blood PC2 & PC3

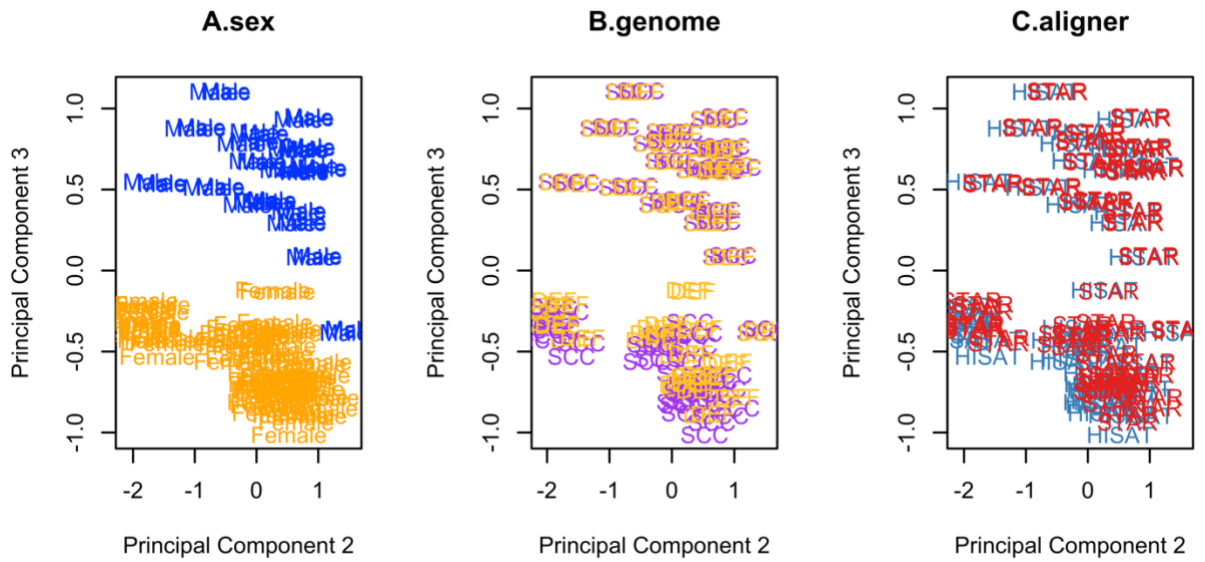

### C) Brain cortex PC1 & PC2

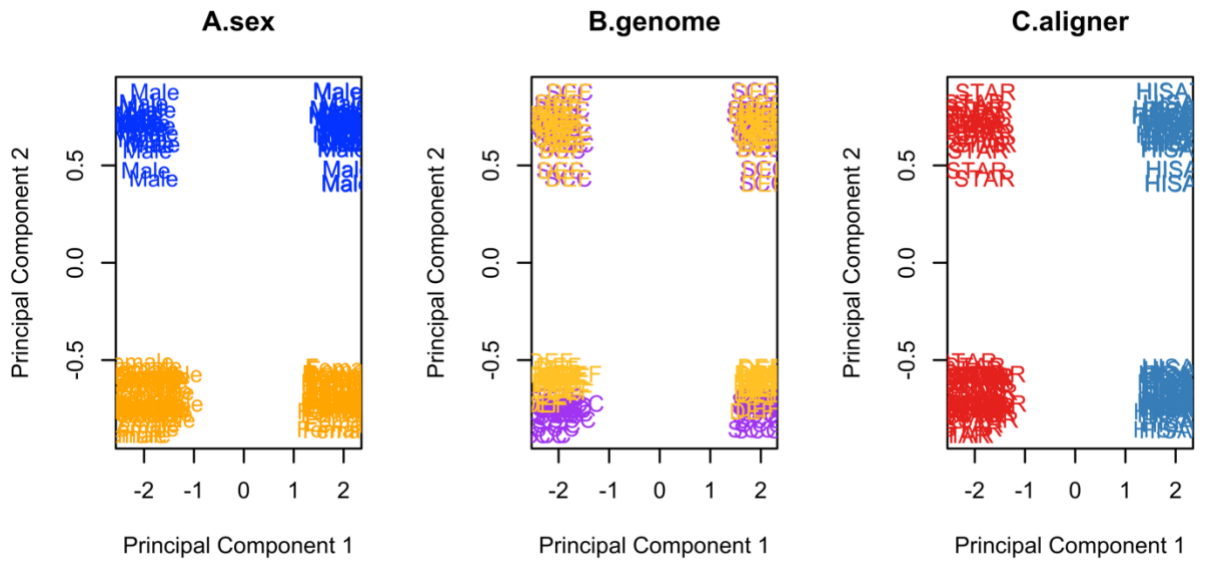

### D) Brain cortex PC2 & PC3

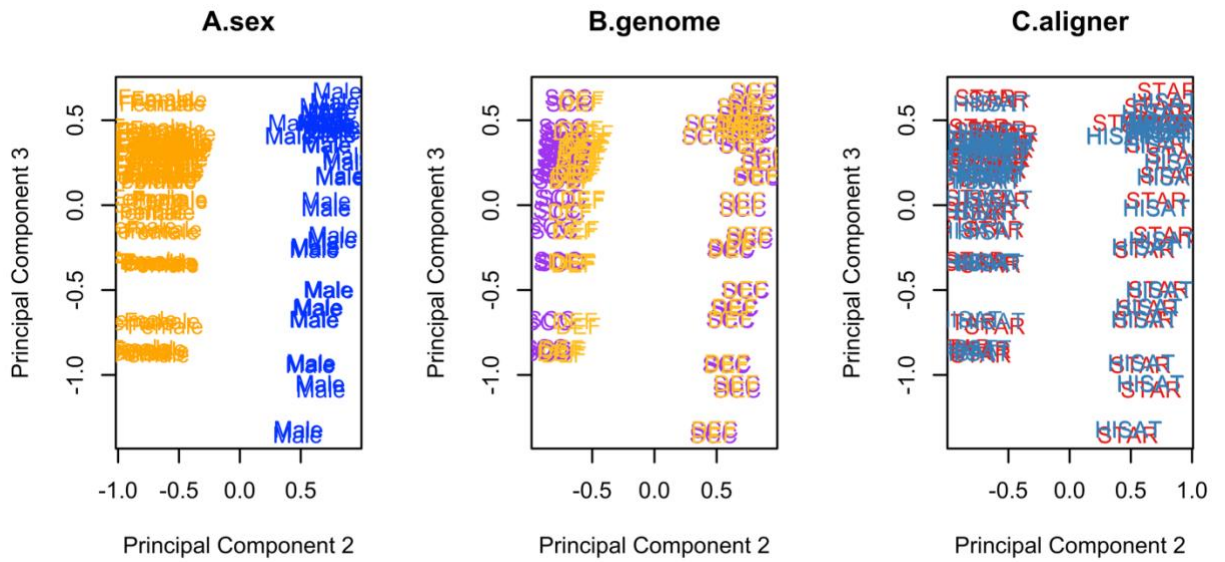

## E) Breast PC1 & PC2

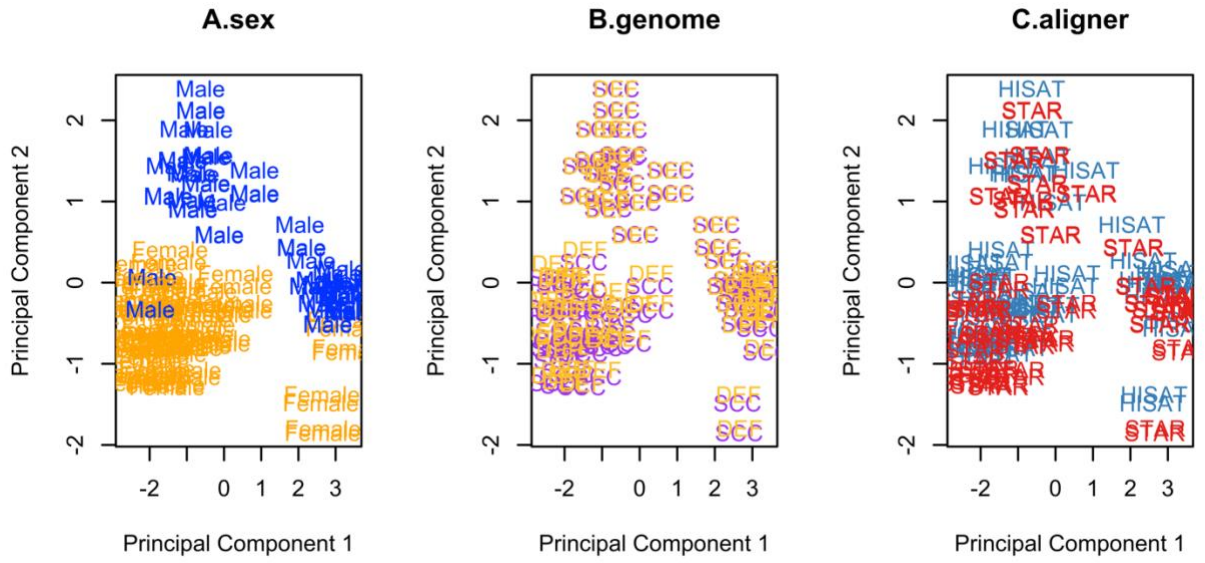

## F) Breast PC2 & PC3

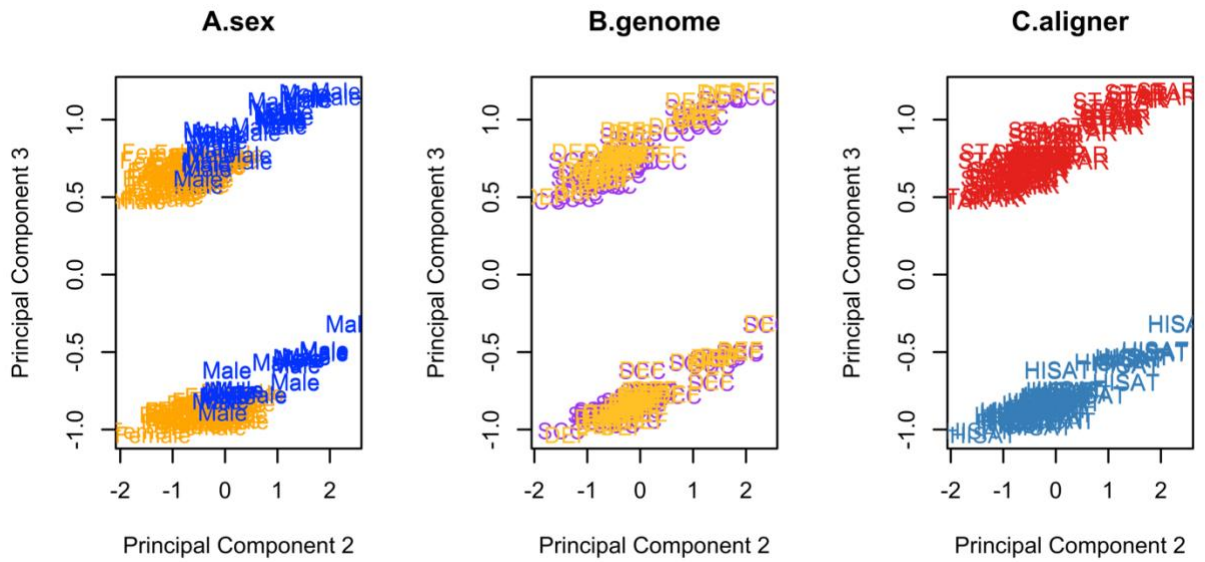

### G) Liver PC1 & PC2

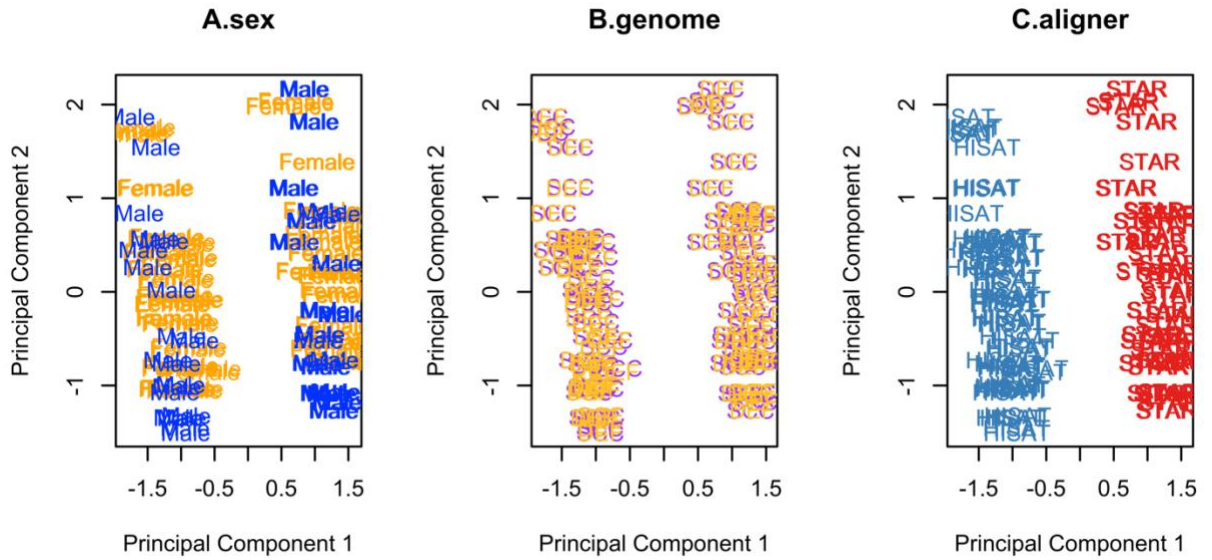

### H) Liver PC2 & PC3

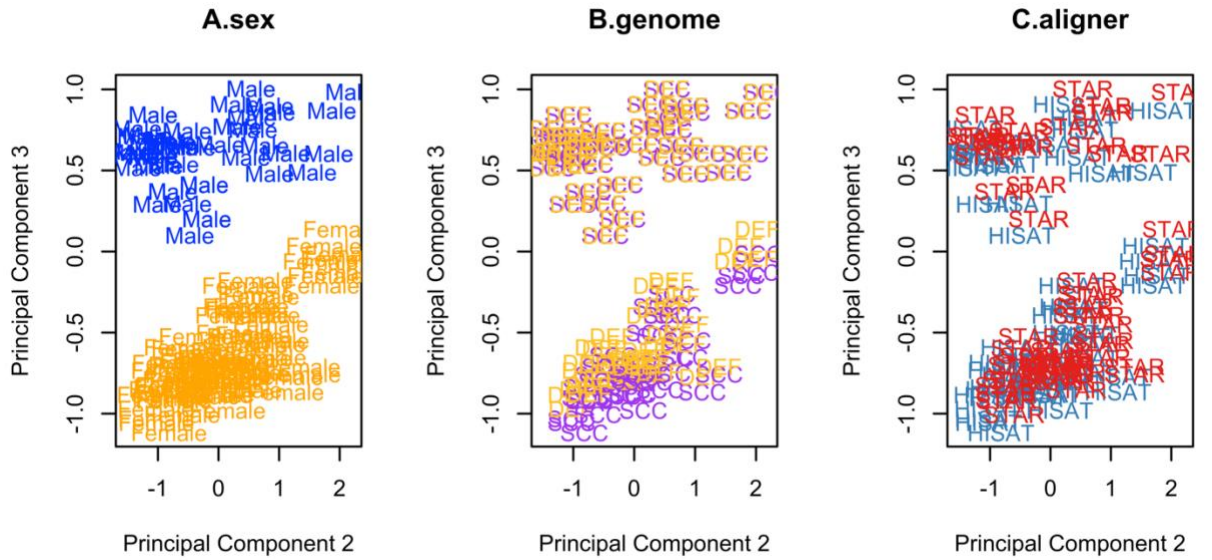

# I) Thyroid PC1 & PC2

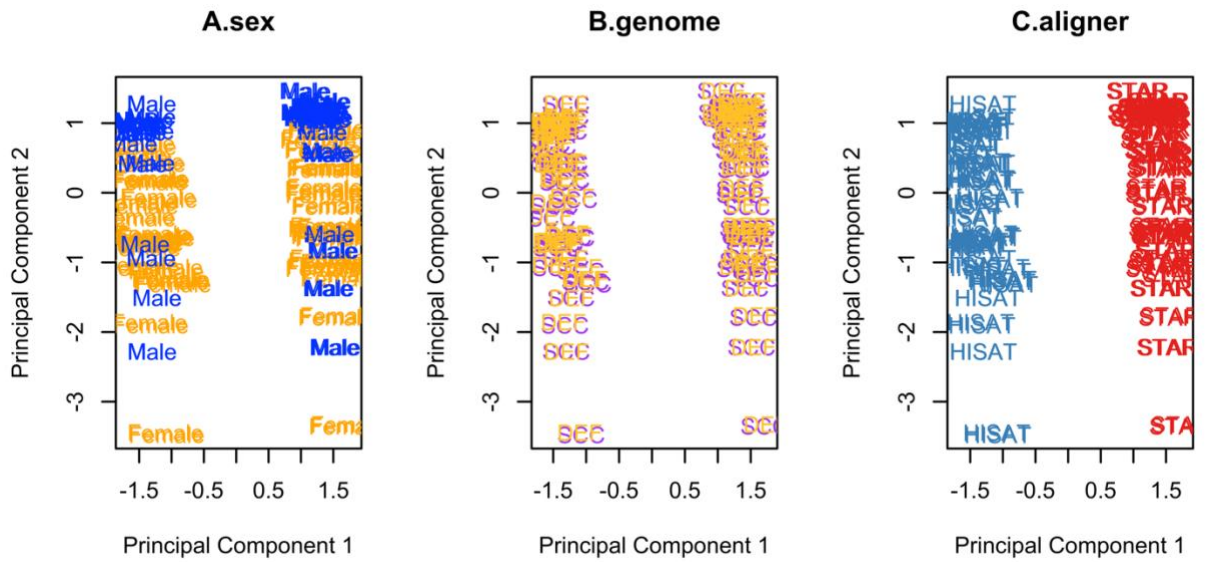

# J) Thyroid PC2 & PC3

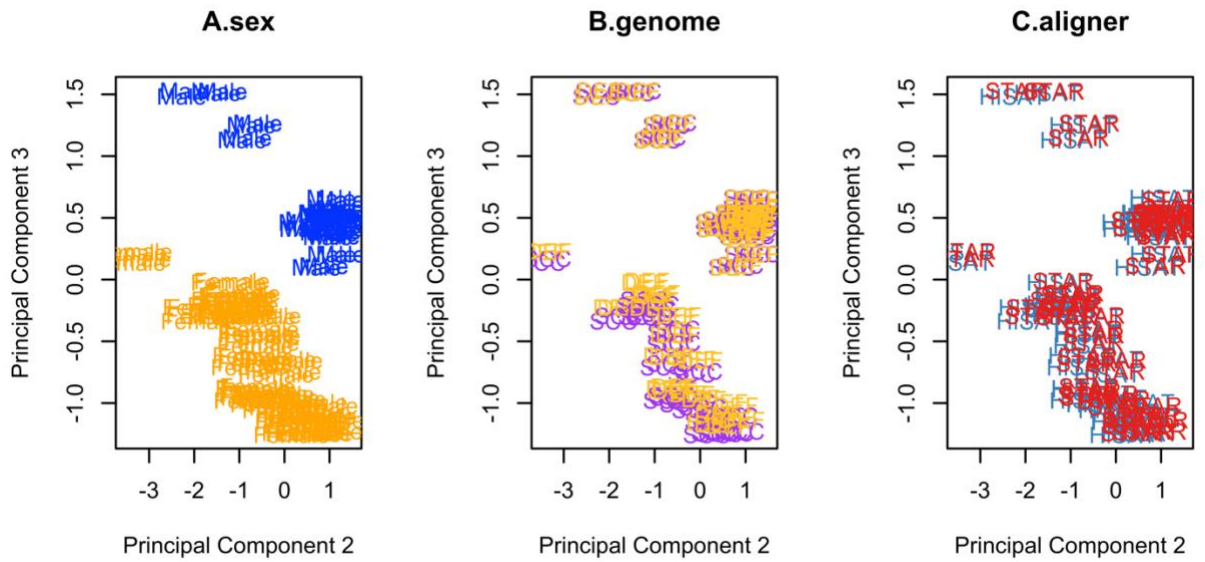

Supplement: 13293_2020_312_MOESM6_ESM.pdf [file 13293_2020_312_MOESM6_ESM.pdf]
