# Supplementary material for: Reference genome and transcriptome informed by the sex chromosome complement of the sample increase ability to detect sex differences in gene expression from RNA-Seq data
Source: PubMed Central journal article supplement (PMC7374973; doi:10.1186/s13293-020-00312-9), 2020-07-21

# HISAT mapped reads

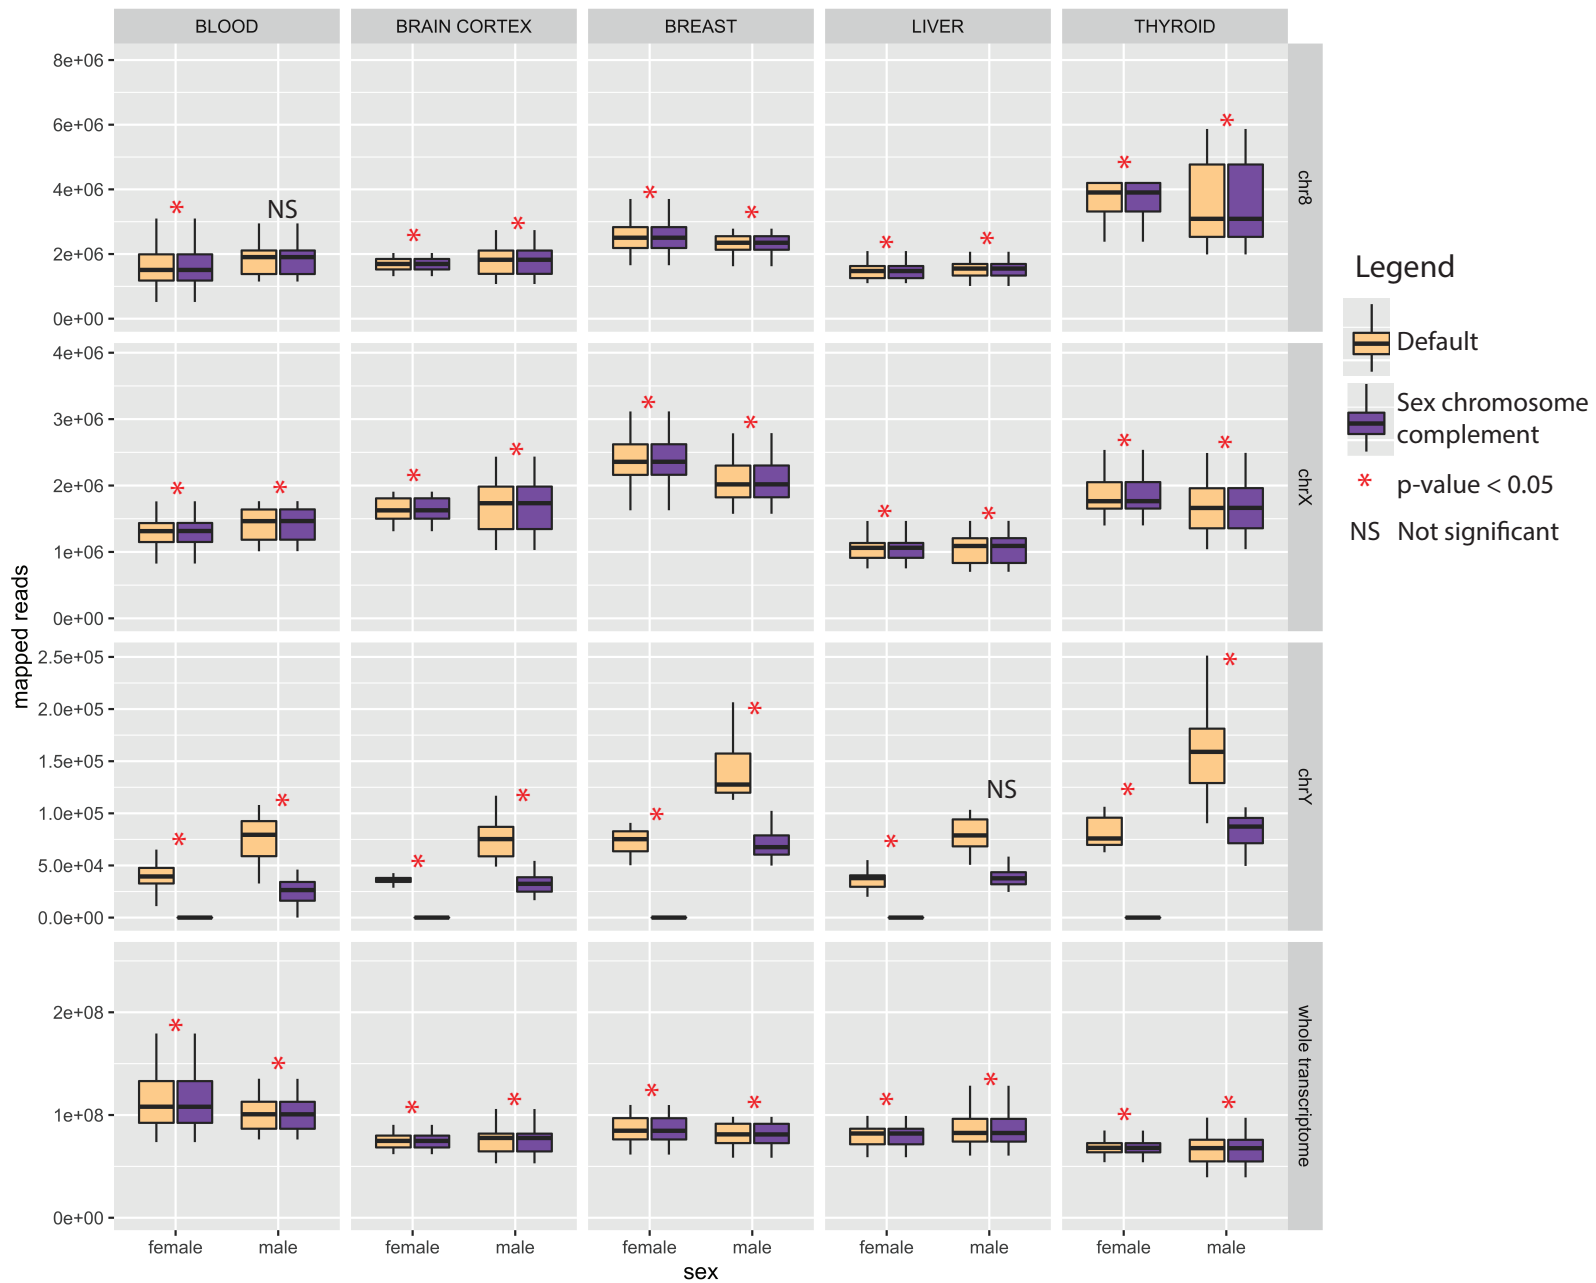

Supplement: 13293_2020_312_MOESM7_ESM.pdf [file 13293_2020_312_MOESM7_ESM.pdf]
