# Supplementary material for: Reference genome and transcriptome informed by the sex chromosome complement of the sample increase ability to detect sex differences in gene expression from RNA-Seq data
Source: PubMed Central journal article supplement (PMC7374973; doi:10.1186/s13293-020-00312-9), 2020-07-21
Supplement: 13293_2020_312_MOESM19_ESM.pdf [file 13293_2020_312_MOESM19_ESM.pdf]

**A**

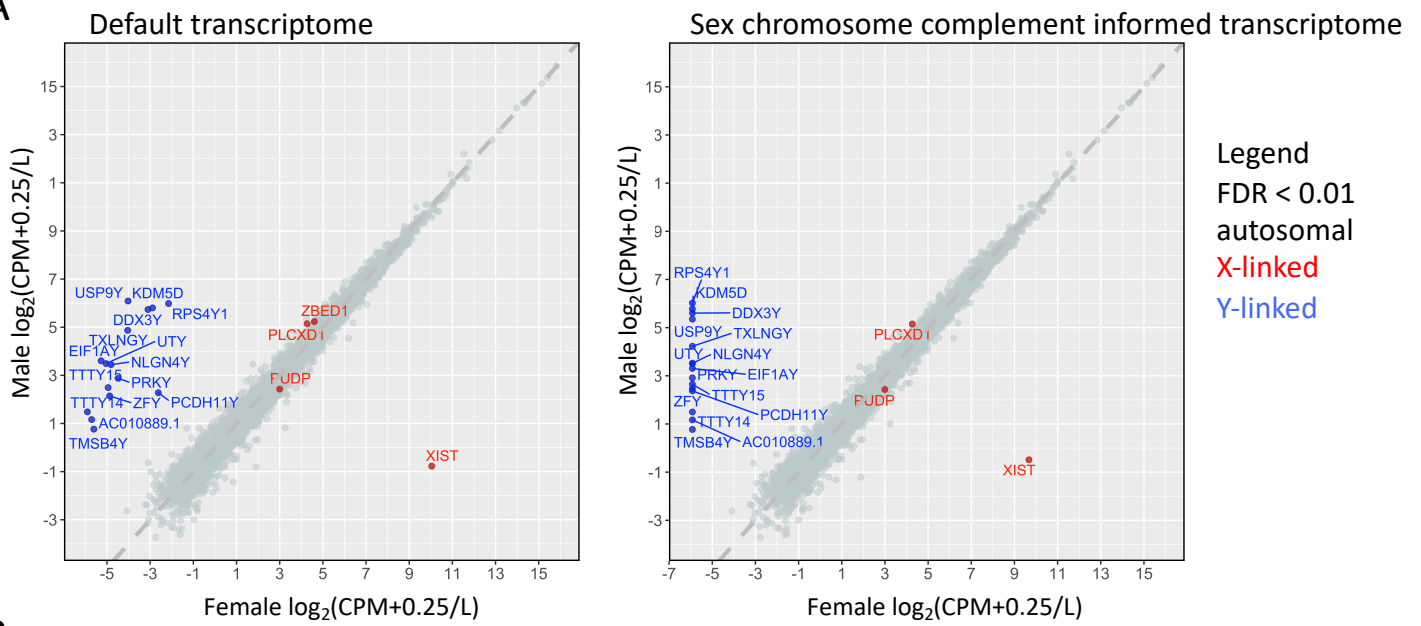

**B**

| Genes     | Total | Unique |
|-----------|-------|--------|
| Autosomal | 0     | 0      |
| X-linked  | 2     | 1      |
| Y-linked  | 15    | 0      |

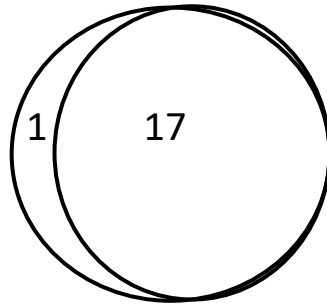

| Genes     | Total | Unique |
|-----------|-------|--------|
| Autosomal | 0     | 0      |
| X-linked  | 2     | 0      |
| Y-linked  | 15    | 0      |
